# Supplementary material
Source: bioRxiv or medRxiv preprint supplement (https://www.biorxiv.org/highwire/filestream/115769/field_highwire_adjunct_files/0/381525-1.pdf)
Supplement: Supplementary file [file 381525-1.pdf]

**SUPPLEMENTAL TABLE 1**

| Uniprot ID | Gene Name | Description                       | Summary    |            |            |                  | Secretory Filter | High-confidence interactor |
|------------|-----------|-----------------------------------|------------|------------|------------|------------------|------------------|----------------------------|
|            |           |                                   | Average    | St. Dev.   | p-value    | q-value (Storey) |                  |                            |
| XXXXXX     | LC        | lambda LC                         | 4.75230072 | 1.18290651 | 4.7298E-07 | 0.0001955        | TRUE             | TRUE                       |
| Q96AY3     | FKBP10    | Peptidyl-prolyl cis-trans isomera | 3.06327375 | 0.28615388 | 0.00289612 | 0.022167832      | TRUE             | TRUE                       |
| O43493     | TGOLN2    | Trans-Golgi network integral me   | 2.25405485 | 0.43937022 | 0.00197389 | 0.01942563       | TRUE             | TRUE                       |
| Q13162     | PRDX4     | Peroxiredoxin-4 OS                | 2.23119412 | 1.67665843 | 0.00703889 | 0.040977591      | FALSE            | TRUE                       |
| O94905     | ERLIN2    | Erlin-2 OS                        | 2.13300763 | 0.74237784 | 0.01046761 | 0.050901319      | TRUE             | TRUE                       |
| P27797     | CALR      | Calreticulin OS                   | 2.10320478 | 1.34729845 | 0.00080612 | 0.010412429      | TRUE             | TRUE                       |
| P11021     | HSPA5     | 78 kDa glucose-regulated protei   | 1.9940112  | 0.9014001  | 6.3572E-05 | 0.003284571      | TRUE             | TRUE                       |
| P30040     | ERP29     | Endoplasmic reticulum resident    | 1.97895203 | 0.65505003 | 0.00020446 | 0.004447797      | TRUE             | TRUE                       |
| Q8NBJ5     | GLT25D1   | Procollagen galactosyltransfera   | 1.96136329 | 0.55433876 | 5.4285E-06 | 0.00112188       | TRUE             | TRUE                       |
| Q8NBS9     | TXNDC5    | Thioredoxin domain-containing     | 1.89674968 | 0.5912589  | 0.00014633 | 0.004032079      | TRUE             | TRUE                       |
| O75718     | CRTAP     | Cartilage-associated protein OS   | 1.88298216 | 0.803618   | 0.05569025 | 0.107063419      | TRUE             | TRUE                       |
| Q14697     | GANAB     | Neutral alpha-glucosidase AB O    | 1.83149443 | 0.65166322 | 9.4618E-06 | 0.001303628      | TRUE             | TRUE                       |
| O43852     | CALU      | Calumenin OS                      | 1.79518036 | 0.56773748 | 0.00211137 | 0.019834043      | TRUE             | TRUE                       |
| P07237     | P4HB      | Protein disulfide-isomerase OS    | 1.78289028 | 0.87393424 | 0.00011797 | 0.003750683      | TRUE             | TRUE                       |
| Q05707     | COL14A1   | Collagen alpha-1(XIV) chain OS    | 1.78003757 | 0.28262542 | 0.00829871 | 0.044547167      | TRUE             | TRUE                       |
| Q13217     | DNAJC3    | DnaJ homolog subfamily C mem      | 1.77114741 | 0.71503872 | 0.05026736 | 0.060606005      | TRUE             | TRUE                       |
| Q15293     | RCN1      | Reticulocalbin-1 OS               | 1.76533273 | 0.64828156 | 0.00011605 | 0.003997233      | TRUE             | TRUE                       |
| P23284     | PPIB      | Peptidyl-prolyl cis-trans isomera | 1.70822136 | 0.73658067 | 4.4031E-05 | 0.003639889      | TRUE             | TRUE                       |
| P55145     | MANF      | Mesencephalic astrocyte-derive    | 1.68536698 | 0.35453094 | 0.00246734 | 0.02081292       | TRUE             | TRUE                       |
| P43674     | P4HA1     | Prolyl 4-hydroxylase subunit alp  | 1.68078224 | 0.6267305  | 0.01268373 | 0.056372155      | TRUE             | TRUE                       |
| Q15084     | PDIA6     | Protein disulfide-isomerase A6 (  | 1.65600005 | 0.6603452  | 2.3736E-05 | 0.002452741      | TRUE             | TRUE                       |
| P30101     | PDIA3     | Protein disulfide-isomerase A3 (  | 1.6552492  | 0.79996849 | 0.000106   | 0.003983083      | TRUE             | TRUE                       |
| Q32P28     | LEPRE1    | Prolyl 3-hydroxylase 1 OS         | 1.63205803 | 0.14041801 | 0.0001744  | 0.004004834      | TRUE             | TRUE                       |
| P02786     | TFRC      | Transferrin receptor protein 1 C  | 1.59504573 | 0.55583192 | 0.00089935 | 0.010933312      | FALSE            | TRUE                       |
| Q02809     | PLOD1     | Procollagen-lysine,2-oxoglutar    | 1.57398774 | 0.45246185 | 9.2771E-05 | 0.004260576      | TRUE             | TRUE                       |
| P14625     | HSP90B1   | Endoplasmic OS                    | 1.56372624 | 0.85186908 | 0.00025792 | 0.004635022      | TRUE             | TRUE                       |
| Q969V3     | NCLN      | Nicalin OS                        | 1.55796652 | 0.6953543  | 0.02072377 | 0.071381887      | TRUE             | TRUE                       |
| P49257     | LMAN1     | Protein ERGIC-53 OS               | 1.54745406 | 0.69676746 | 0.0001587  | 0.00385867       | TRUE             | TRUE                       |
| O75976     | CPD       | Carboxypeptidase D OS             | 1.52942382 | 0.73630149 | 0.00025069 | 0.004709873      | FALSE            | TRUE                       |
| Q9UBS4     | DNAJB11   | DnaJ homolog subfamily B mem      | 1.5261448  | 0.75614141 | 0.00012787 | 0.003775335      | TRUE             | TRUE                       |
| O60568     | PLOD3     | Procollagen-lysine,2-oxoglutar    | 1.51474923 | 0.71523735 | 0.00906652 | 0.046843668      | TRUE             | TRUE                       |
| Q8IXB1     | DNAJC10   | DnaJ homolog subfamily C mem      | 1.51400127 | 0.95173076 | 0.05003347 | 0.107710947      | TRUE             | TRUE                       |
| Q08380     | LGALS3BP  | Galectin-3-binding protein OS     | 1.50086571 | 0.62621157 | 9.3339E-05 | 0.003858012      | FALSE            | TRUE                       |
| P13667     | PDIA4     | Protein disulfide-isomerase A4 (  | 1.49714889 | 0.80129093 | 0.00022668 | 0.004684741      | TRUE             | TRUE                       |
| P50454     | SERPINH1  | Serpin H1 OS                      | 1.45524259 | 0.70434293 | 0.00389707 | 0.02684645       | TRUE             | TRUE                       |
| Q9NYU2     | UGGT1     | UDP-glucose:glycoprotein gluco    | 1.44255078 | 0.84458051 | 0.0009027  | 0.010660481      | TRUE             | TRUE                       |
| P14314     | PRKCSH    | Glucosidase 2 subunit beta OS     | 1.44109195 | 0.62740512 | 4.7471E-05 | 0.003270198      | TRUE             | TRUE                       |
| P04844     | RPN2      | Dolichyl-diphosphooligosacchar    | 1.42805193 | 0.65458849 | 0.00307967 | 0.022332139      | TRUE             | TRUE                       |
| O75477     | ERLIN1    | Erlin-1 OS                        | 1.42066733 | 0.92422497 | 0.05437895 | 0.107031582      | TRUE             | TRUE                       |
| P34931     | HSPA1L    | Heat shock 70 kDa protein 1-like  | 1.39269247 | 0.51688369 | 0.00038356 | 0.006097548      | FALSE            | TRUE                       |
| Q13724     | MOGS      | Mannosyl-oligosaccharide gluco    | 1.38873861 | 0.19094313 | 0.0617001  | 0.114361918      | TRUE             | TRUE                       |
| P40227     | CCT6A     | T-complex protein 1 subunit zet   | 1.38504583 | 0.49320723 | 0.03976373 | 0.09901009       | FALSE            | TRUE                       |
| Q9Y2B0     | CNPY2     | Protein canopy homolog 2 OS       | 1.37040981 | 1.09616283 | 0.02802773 | 0.083343842      | TRUE             | TRUE                       |
| Q92896     | GLG1      | Golgi apparatus protein 1 OS      | 1.36476817 | 0.51979701 | 0.01345007 | 0.059142149      | TRUE             | TRUE                       |
| Q8NBJ4     | GOLM1     | Golgi membrane protein 1 OS       | 1.35631502 | 0.20373865 | 0.00743769 | 0.042112949      | TRUE             | TRUE                       |
| P39656     | DDOST     | Dolichyl-diphosphooligosacchar    | 1.32920506 | 0.57258409 | 0.00234446 | 0.020617923      | TRUE             | TRUE                       |
| Q9P035     | PTPLAD1   | 3-hydroxyacyl-CoA dehydratase     | 1.32049449 | 0.11422565 | 0.03889121 | 0.098018494      | TRUE             | TRUE                       |
| P27824     | CANX      | Calnexin OS                       | 1.30689067 | 0.75410113 | 0.00038998 | 0.005970039      | TRUE             | TRUE                       |
| Q9Y4L1     | HYOU1     | Hypoxia up-regulated protein 1    | 1.27389268 | 0.57300015 | 6.1165E-05 | 0.003611673      | TRUE             | TRUE                       |
| P49458     | SRP9      | Signal recognition particle 9 kDa | 1.26985233 | 0.40859976 | 0.03282219 | 0.090443367      | FALSE            | TRUE                       |
| Q14257     | RCN2      | Reticulocalbin-2 OS               | 1.26704728 | 0.58932922 | 0.00860093 | 0.045000659      | TRUE             | TRUE                       |
| P04843     | RPN1      | Dolichyl-diphosphooligosacchar    | 1.25853843 | 0.95950749 | 0.00249252 | 0.020604815      | TRUE             | TRUE                       |
| Q9H3N1     | TMX1      | Thioredoxin-related transmembr    | 1.2557658  | 0.48351691 | 0.00437428 | 0.029161845      | TRUE             | TRUE                       |
| Q96HE7     | ERO1L     | ERO1-like protein alpha OS        | 1.23631326 | 0.7818484  | 0.01172101 | 0.054434635      | TRUE             | TRUE                       |
| P54652     | HSPA2     | Heat shock-related 70 kDa prote   | 1.2253286  | 0.4898754  | 0.00168071 | 0.017367301      | FALSE            | TRUE                       |
| P68371     | TUBB2C    | Tubulin beta-2C chain OS          | 1.22272374 | 0.49598363 | 0.05071157 | 0.104803902      | FALSE            | TRUE                       |
| P46977     | STT3A     | Dolichyl-diphosphooligosacchar    | 1.21993973 | 0.49464376 | 0.00527665 | 0.033045673      | TRUE             | TRUE                       |
| Q9NXG2     | THUMPD1   | THUMP domain-containing prot      | 1.20512112 | 0.22773149 | 0.0116948  | 0.0549301        | FALSE            | TRUE                       |
| Q9Y490     | TLN1      | Talin-1 OS                        | 1.1740542  | 0.93337311 | 0.04818615 | 0.107080331      | FALSE            | TRUE                       |
| O43405     | COCH      | Cochlin OS                        | 1.1069496  | 0.40508014 | 0.04185547 | 0.101766245      | FALSE            | TRUE                       |
| P49207     | RPL34     | 60S ribosomal protein L34 OS      | 1.10666456 | 0.38607117 | 0.01053656 | 0.050640824      | FALSE            | TRUE                       |
| Q07065     | CKAP4     | Cytoskeleton-associated protei    | 1.09846242 | 0.88182607 | 0.00968485 | 0.047655608      | TRUE             | TRUE                       |
| P53396     | ACLY      | ATP-citrate synthase OS           | 1.08534664 | 0.76435334 | 0.01617795 | 0.060789868      | FALSE            | TRUE                       |
| Q07955     | SRSF1     | Serine/arginine-rich splicing fac | 1.08515089 | 0.67580982 | 0.00266255 | 0.021163888      | FALSE            | TRUE                       |
| Q16706     | MAN2A1    | Alpha-mannosidase 2 OS            | 1.07086787 | 0.4711781  | 0.05888953 | 0.110640941      | TRUE             | TRUE                       |
| P23526     | AHCY      | Adenosylhomocysteinase OS         | 1.06875679 | 0.27265793 | 0.02101347 | 0.07178156       | FALSE            | TRUE                       |
| Q9B526     | ERP44     | Endoplasmic reticulum resident    | 1.0666411  | 0.41614289 | 0.00150556 | 0.01595637       | TRUE             | TRUE                       |
| O14737     | PDCD5     | Programmed cell death protein     | 1.05799059 | 0.47660293 | 0.00107861 | 0.012049379      | FALSE            | TRUE                       |
| Q8WVK2     | SNRNP27   | U4/U6.U5 small nuclear ribonuc    | 1.04648397 | 0.04143821 | 0.00052225 | 0.007443509      | FALSE            | TRUE                       |
| Q71U36     | TUBA1A    | Tubulin alpha-1A chain OS         | 1.04026791 | 0.3511251  | 0.00077621 | 0.01034945       | FALSE            | TRUE                       |
| Q14204     | DYNC1H1   | Cytoplasmic dynein 1 heavy cha    | 1.02777224 | 0.67627053 | 0.05588807 | 0.106946313      | FALSE            | TRUE                       |
| O76094     | SRP72     | Signal recognition particle 72 kD | 1.0129532  | 0.32649503 | 0.03292909 | 0.090137028      | TRUE             | TRUE                       |

|        |           |                                    |            |            |            |             |       |       |
|--------|-----------|------------------------------------|------------|------------|------------|-------------|-------|-------|
| Q2VIR3 | EIF2S3L   | Eukaryotic translation initiation  | 1.00901244 | 0.05377714 | 0.02398064 | 0.076837203 | FALSE | TRUE  |
| B9A064 | IGLL5     | Immunoglobulin lambda-like po      | 2.02968566 | 1.89194942 | 0.20425523 | 0.183933542 | FALSE | FALSE |
| O95302 | FKBP9     | Peptidyl-prolyl cis-trans isomera  | 1.97740841 | 0.78323765 | 0.17385    | 0.174412618 | TRUE  | FALSE |
| P11047 | LAMC1     | Laminin subunit gamma-1 OS         | 1.92621734 | 1.06525536 | 0.08860682 | 0.137169106 | FALSE | FALSE |
| P07942 | LAMB1     | Laminin subunit beta-1 OS          | 1.87338784 | 0.56597275 | 0.1339842  | 0.164821837 | FALSE | FALSE |
| Q01130 | SRSF2     | Serine/arginine-rich splicing fact | 1.7127625  | 1.71722745 | 0.22621083 | 0.192784487 | FALSE | FALSE |
| Q9HCN8 | SDF2L1    | Stromal cell-derived factor 2-like | 1.65315946 | 0.44591866 | 0.11998331 | 0.155464264 | TRUE  | FALSE |
| Q9BVK6 | TMED9     | Transmembrane emp24 domain         | 1.6378686  | 0.57142354 | 0.15397773 | 0.168817321 | TRUE  | FALSE |
| O75533 | SF3B1     | Splicing factor 3B subunit 1 OS    | 1.60702792 | 2.41353503 | 0.21075532 | 0.186535757 | FALSE | FALSE |
| Q15006 | TTC35     | Tetratricopeptide repeat protei    | 1.45342339 | 0.26300327 | 0.08101784 | 0.132361159 | TRUE  | FALSE |
| Q8TCJ2 | STT3B     | Dolichyl-diphosphooligosacchar     | 1.41842143 | 0.38255192 | 0.11996825 | 0.15593358  | TRUE  | FALSE |
| P49755 | TMED10    | Transmembrane emp24 domain         | 1.40110148 | 0.54192974 | 0.1699595  | 0.173456613 | TRUE  | FALSE |
| Q9Y678 | COPG      | Coatomer subunit gamma OS          | 1.39628521 | 0.57218864 | 0.17955428 | 0.175866753 | TRUE  | FALSE |
| Q96KA5 | CLPTM1L   | Cleft lip and palate transmembr    | 1.38946506 | 0.79576971 | 0.24496177 | 0.201293965 | FALSE | FALSE |
| O00461 | GOLIM4    | Golgi integral membrane protei     | 1.33209252 | 0.68808444 | 0.07859672 | 0.129428861 | TRUE  | FALSE |
| Q9H0U3 | MAGT1     | Magnesium transporter protein      | 1.32172526 | 0.84976386 | 0.27163525 | 0.211442383 | FALSE | FALSE |
| Q9BVC6 | TMEM109   | Transmembrane protein 109 OS       | 1.31603004 | 0.28064018 | 0.09527734 | 0.14014697  | FALSE | FALSE |
| Q9UMX5 | NENF      | Neudesin OS                        | 1.31502601 | 1.25353828 | 0.2108548  | 0.186225041 | FALSE | FALSE |
| Q99961 | SH3GL1    | Endophilin-A2 OS                   | 1.28294683 | 0.42232078 | 0.14559077 | 0.167159772 | FALSE | FALSE |
| P45877 | PPIC      | Peptidyl-prolyl cis-trans isomera  | 1.2474372  | 0.57430338 | 0.20035856 | 0.18362499  | FALSE | FALSE |
| Q92520 | FAM3C     | Protein FAM3C OS                   | 1.15311452 | 0.85757648 | 0.30821019 | 0.225475305 | TRUE  | FALSE |
| P80303 | NUCB2     | Nucleobindin-2 OS                  | 1.1440141  | 0.84445207 | 0.14352729 | 0.168058394 | TRUE  | FALSE |
| P31689 | DNAJ1     | DnaJ homolog subfamily A mem       | 1.13761716 | 0.36779337 | 0.14307812 | 0.168487059 | FALSE | FALSE |
| P11717 | IGF2R     | Cation-independent mannose-6       | 1.13675347 | 0.21833012 | 0.0859337  | 0.1355697   | FALSE | FALSE |
| P41091 | EIF2S3    | Eukaryotic translation initiation  | 1.10280487 | 0.39017551 | 0.15606395 | 0.169308221 | FALSE | FALSE |
| Q01844 | EWSR1     | RNA-binding protein EWS OS         | 1.09105061 | 0.32946745 | 0.13392426 | 0.165239881 | FALSE | FALSE |
| P35613 | BSG       | Basigin OS                         | 1.0849802  | 0.60421567 | 0.23881774 | 0.199416834 | FALSE | FALSE |
| P49321 | NASP      | Nuclear autoantigenic sperm pr     | 1.08388995 | 0.50699931 | 0.06581445 | 0.115268244 | FALSE | FALSE |
| P53999 | SUB1      | Activated RNA polymerase II tra    | 1.0838203  | 1.05909755 | 0.08401752 | 0.133566315 | FALSE | FALSE |
| P06744 | GPI       | Glucose-6-phosphate isomerase      | 1.05487779 | 0.4854168  | 0.20026795 | 0.183949823 | FALSE | FALSE |
| O15347 | HMGB3     | High mobility group protein B3 (   | 1.05238715 | 0.87274806 | 0.17196748 | 0.173789466 | FALSE | FALSE |
| Q15155 | NOMO1     | Nodal modulator 1 OS               | 1.03565427 | 0.99473705 | 0.0804241  | 0.131912553 | FALSE | FALSE |
| Q99615 | DNAJ7     | DnaJ homolog subfamily C mem       | 1.02734191 | 0.76559392 | 0.14571513 | 0.166839116 | FALSE | FALSE |
| P24534 | EEF1B2    | Elongation factor 1-beta OS        | 1.01491858 | 0.60542446 | 0.25411507 | 0.205949472 | TRUE  | FALSE |
| Q9Y6E2 | BZW2      | Basic leucine zipper and W2 dor    | 1.00398169 | 0.61815045 | 0.10654559 | 0.148779876 | FALSE | FALSE |
| P08107 | HSPA1A    | Heat shock 70 kDa protein 1A/1     | 0.9918951  | 0.74500751 | 0.00227206 | 0.020415582 | FALSE | FALSE |
| P61106 | RAB14     | Ras-related protein Rab-14 OS      | 0.97902123 | 0.38567315 | 0.04803248 | 0.107315811 | TRUE  | FALSE |
| P11142 | HSPA8     | Heat shock cognate 71 kDa prot     | 0.97222081 | 0.73675172 | 0.00240106 | 0.020675789 | FALSE | FALSE |
| Q5VTE0 | EEF1A1P5  | Putative elongation factor 1-alp   | 0.96832033 | 0.75148044 | 0.00823701 | 0.044797748 | FALSE | FALSE |
| P62979 | RPS27A    | Ubiquitin-40S ribosomal protein    | 0.96439603 | 0.30754553 | 0.03226722 | 0.090115658 | FALSE | FALSE |
| Q00059 | TFAM      | Transcription factor A, mitochor   | 0.96352049 | 0.30422863 | 0.0316622  | 0.08902751  | FALSE | FALSE |
| Q08123 | NSUN2     | tRNA (cytosine-5-)-methyltransf    | 0.96283463 | 0.38435014 | 0.04922732 | 0.107091004 | FALSE | FALSE |
| P20042 | EIF2S2    | Eukaryotic translation initiation  | 0.96184013 | 0.40694138 | 0.01793823 | 0.065039183 | FALSE | FALSE |
| P82970 | HMGN5     | High mobility group nucleosom      | 0.95900978 | 0.26921395 | 0.02527636 | 0.079148184 | FALSE | FALSE |
| P08708 | RPS17     | 40S ribosomal protein S17 OS       | 0.95465144 | 0.30233635 | 0.14025035 | 0.166580874 | FALSE | FALSE |
| O00469 | PLOD2     | Procollagen-lysine,2-oxoglutar     | 0.9484081  | 0.45928591 | 0.21003095 | 0.187500631 | TRUE  | FALSE |
| Q9BRL6 | SRSF8     | Serine/arginine-rich splicing fact | 0.94665199 | 0.55865753 | 0.04280562 | 0.102866211 | FALSE | FALSE |
| P62918 | COPB1     | Coatomer subunit beta OS           | 0.94365634 | 0.3775271  | 0.17550817 | 0.17354875  | TRUE  | FALSE |
| P55039 | DRG2      | Developmentally-regulated GTP      | 0.94048273 | 0.15251188 | 0.07268174 | 0.12312207  | FALSE | FALSE |
| O00429 | DNM1L     | Dynamin-1-like protein OS          | 0.93596991 | 0.23854592 | 0.11351113 | 0.153326576 | TRUE  | FALSE |
| P16615 | ATP2A2    | Sarcoplasmic/endoplasmic retic     | 0.93312868 | 0.86407987 | 0.02890852 | 0.084146866 | TRUE  | FALSE |
| Q99832 | CTC7      | T-complex protein 1 subunit eta    | 0.93179187 | 0.29746422 | 0.03233262 | 0.08969228  | FALSE | FALSE |
| Q13243 | SRSF5     | Serine/arginine-rich splicing fact | 0.92790942 | 0.58805577 | 0.00584719 | 0.03554174  | FALSE | FALSE |
| P26640 | VARS      | Valyl-tRNA synthetase OS           | 0.92613804 | 0.30326662 | 0.03393303 | 0.092274035 | FALSE | FALSE |
| Q5JTV8 | TOR1AIP1  | Torsin-1A-interacting protein 1    | 0.92122546 | 0.57799657 | 0.04980073 | 0.10777122  | FALSE | FALSE |
| P26373 | RPL13     | 60S ribosomal protein L13 OS       | 0.92010506 | 0.68287398 | 0.00210849 | 0.020267652 | FALSE | FALSE |
| P62277 | RPS13     | 40S ribosomal protein S13 OS       | 0.91948512 | 0.56539449 | 0.02203364 | 0.072857911 | FALSE | FALSE |
| Q9Y5M8 | SRPRB     | Signal recognition particle rece   | 0.9157294  | 0.71314486 | 0.15614801 | 0.16895596  | TRUE  | FALSE |
| Q9NSD9 | FARSB     | Phenylalanyl-tRNA synthetase b     | 0.9132397  | 0.40189982 | 0.01995369 | 0.070491652 | FALSE | FALSE |
| Q15424 | SAFB      | Scaffold attachment factor B1 O    | 0.90998962 | 0.05879797 | 0.02906625 | 0.083430915 | FALSE | FALSE |
| Q99729 | HNRNPAB   | Heterogeneous nuclear ribonuc      | 0.90771716 | 0.41386414 | 0.02194219 | 0.073140618 | FALSE | FALSE |
| Q9P2E9 | RRBP1     | Ribosome-binding protein 1 OS      | 0.90725094 | 0.31202925 | 0.0372403  | 0.095606568 | TRUE  | FALSE |
| Q14444 | CAPRN1    | Caprin-1 OS                        | 0.90713344 | 0.46827436 | 0.22281099 | 0.193884652 | FALSE | FALSE |
| Q92616 | GCN1L1    | Translational activator GCN1 OS    | 0.89615451 | 0.30819866 | 0.15186708 | 0.168288813 | FALSE | FALSE |
| P62701 | RPS4X     | 40S ribosomal protein S4, X isof   | 0.89373723 | 0.73957796 | 0.01116586 | 0.053048508 | FALSE | FALSE |
| Q9UQ80 | PA2G4     | Proliferation-associated protein   | 0.89348079 | 0.35490455 | 0.01510034 | 0.058881829 | FALSE | FALSE |
| P24666 | ACP1      | Low molecular weight phosphot      | 0.89250815 | 0.36501771 | 0.17921625 | 0.175952615 | FALSE | FALSE |
| Q14696 | MESDC2    | LDLR chaperone MESD OS             | 0.89095335 | 0.2808772  | 0.03156818 | 0.089371097 | TRUE  | FALSE |
| P43487 | RANBP1    | Ran-specific GTPase-activating p   | 0.88300547 | 0.65717007 | 0.30839982 | 0.225215419 | FALSE | FALSE |
| Q04637 | EIF4G1    | Eukaryotic translation initiation  | 0.88288348 | 0.46985106 | 0.01367676 | 0.058278986 | FALSE | FALSE |
| Q15056 | EIF4H     | Eukaryotic translation initiation  | 0.88111741 | 0.92693132 | 0.4071618  | 0.260516323 | FALSE | FALSE |
| Q9HB71 | CACYBP    | Cacyclin-binding protein OS        | 0.87913911 | 0.32466841 | 0.1626132  | 0.1714629   | FALSE | FALSE |
| P26641 | EEF1G     | Elongation factor 1-gamma OS       | 0.87683322 | 0.76598423 | 0.01429767 | 0.058511933 | TRUE  | FALSE |
| Q58FF8 | HSP90AB2P | Putative heat shock protein HSP    | 0.86989954 | 1.14233883 | 0.22513156 | 0.192261116 | FALSE | FALSE |
| Q9NR33 | POLE4     | DNA polymerase epsilon subuni      | 0.8696303  | 0.55413735 | 0.26950189 | 0.210973701 | FALSE | FALSE |
| P68400 | CSNK2A1   | Casein kinase II subunit alpha O   | 0.86678717 | 0.30512817 | 0.0389115  | 0.097475271 | FALSE | FALSE |

|         |         |                                    |            |            |            |             |       |       |
|---------|---------|------------------------------------|------------|------------|------------|-------------|-------|-------|
| P12236  | SLC25A6 | ADP/ATP translocase 3 OS           | 0.86643182 | 0.36659223 | 0.0021651  | 0.019886815 | FALSE | FALSE |
| P41252  | IARS    | Isoleucyl-tRNA synthetase, cyto    | 0.86444334 | 0.64037321 | 0.1443451  | 0.167591692 | FALSE | FALSE |
| Q86UP2  | KTN1    | Kinectin OS                        | 0.86151877 | 0.53890755 | 0.2651185  | 0.209526411 | TRUE  | FALSE |
| P05198  | EIF2S1  | Eukaryotic translation initiation  | 0.86063169 | 0.61327459 | 0.06747829 | 0.116698847 | FALSE | FALSE |
| O43681  | ASNA1   | ATPase ASNA1 OS                    | 0.85997849 | 0.37989611 | 0.19274415 | 0.18314387  | TRUE  | FALSE |
| Q9Y559  | RBM8A   | RNA-binding protein 8A OS          | 0.85873516 | 0.69585094 | 0.33124432 | 0.234041573 | FALSE | FALSE |
| Q9UBR2  | CTSZ    | Cathepsin Z OS                     | 0.85850789 | 0.40081857 | 0.20299718 | 0.184003293 | TRUE  | FALSE |
| P62826  | RAN     | GTP-binding nuclear protein Ran    | 0.85802225 | 0.41626129 | 0.21038146 | 0.187005742 | FALSE | FALSE |
| Q13885  | TUBB2A  | Tubulin beta-2A chain OS           | 0.85744702 | 0.08439834 | 0.04423764 | 0.102724099 | FALSE | FALSE |
| P46781  | RPS9    | 40S ribosomal protein S9 OS        | 0.85658122 | 0.73331267 | 0.0080284  | 0.044245393 | FALSE | FALSE |
| Q9UEE9  | CFDP1   | Craniofacial development prote     | 0.85417235 | 0.72858023 | 0.05870571 | 0.110799217 | FALSE | FALSE |
| P84103  | SRSF3   | Serine/arginine-rich splicing fact | 0.85395087 | 0.93998899 | 0.02603006 | 0.08029174  | FALSE | FALSE |
| P15880  | RPS2    | 40S ribosomal protein S2 OS        | 0.85222377 | 0.36475129 | 0.00640788 | 0.038385339 | FALSE | FALSE |
| P62917  | RPL8    | 60S ribosomal protein L8 OS        | 0.85007407 | 0.35243835 | 0.00024818 | 0.004884741 | FALSE | FALSE |
| P43307  | SSR1    | Translocon-associated protein s    | 0.84883498 | 0.54690109 | 0.02557059 | 0.07946751  | TRUE  | FALSE |
| P78371  | CCT2    | T-complex protein 1 subunit bet    | 0.84814422 | 1.14491653 | 0.09770198 | 0.140220434 | FALSE | FALSE |
| Q154370 | TCEB2   | Transcription elongation factor I  | 0.84508547 | 0.55978741 | 0.27886573 | 0.213058229 | FALSE | FALSE |
| Q96A33  | CCDC47  | Coiled-coil domain-containing p    | 0.84478758 | 0.76697877 | 0.36332901 | 0.245787222 | TRUE  | FALSE |
| P31948  | STIP1   | Stress-induced-phosphoprotein      | 0.84273062 | 0.76751055 | 0.11560233 | 0.153640822 | TRUE  | FALSE |
| P62195  | PSMC5   | 26S protease regulatory subunit    | 0.84115442 | 0.36423304 | 0.18915529 | 0.180981909 | FALSE | FALSE |
| Q154435 | PPP1R7  | Protein phosphatase 1 regulato     | 0.83952807 | 0.55956659 | 0.28038568 | 0.213430474 | FALSE | FALSE |
| P62081  | RPS7    | 40S ribosomal protein S7 OS        | 0.83910258 | 0.10323478 | 0.00500759 | 0.031843152 | FALSE | FALSE |
| Q8NHWS  | RPLPOP6 | 60S acidic ribosomal protein P0    | 0.83677254 | 0.47253901 | 0.09188532 | 0.139629657 | FALSE | FALSE |
| P61604  | HSPE1   | 10 kDa heat shock protein, mito    | 0.83463155 | 0.36175536 | 0.01915077 | 0.068831741 | FALSE | FALSE |
| Q13442  | PDAP1   | 28 kDa heat- and acid-stable ph    | 0.82764398 | 0.66304206 | 0.08797739 | 0.136706714 | FALSE | FALSE |
| P09012  | SNRPA   | U1 small nuclear ribonucleoprot    | 0.82482757 | 0.63853409 | 0.08153169 | 0.131639702 | FALSE | FALSE |
| Q14C86  | GAPVD1  | GTPase-activating protein and V    | 0.82360512 | 0.62493827 | 0.31350435 | 0.228136966 | FALSE | FALSE |
| P13639  | EEF2    | Elongation factor 2 OS             | 0.82320025 | 0.64695361 | 0.00300101 | 0.022150327 | FALSE | FALSE |
| P50990  | CCT8    | T-complex protein 1 subunit the    | 0.82049292 | 0.63213162 | 0.00458371 | 0.030073004 | FALSE | FALSE |
| P07437  | TUBB    | Tubulin beta chain OS              | 0.8196638  | 0.85084415 | 0.02956092 | 0.084265617 | FALSE | FALSE |
| P62820  | RAB1A   | Ras-related protein Rab-1A OS      | 0.81930669 | 0.47500419 | 0.04094616 | 0.100144466 | TRUE  | FALSE |
| P68363  | TUBA1B  | Tubulin alpha-1B chain OS          | 0.81879727 | 0.70268322 | 0.34723    | 0.2400029   | FALSE | FALSE |
| P13861  | PRKAR2A | cAMP-dependent protein kinase      | 0.81847892 | 0.38315634 | 0.20350609 | 0.184060943 | FALSE | FALSE |
| P46779  | RPL28   | 60S ribosomal protein L28 OS       | 0.81751679 | 0.27104176 | 0.00913316 | 0.046605412 | FALSE | FALSE |
| P62263  | RPS14   | 40S ribosomal protein S14 OS       | 0.81710289 | 0.29762688 | 0.00356962 | 0.025007488 | FALSE | FALSE |
| Q43175  | PHGDH   | D-3-phosphoglycerate dehydrog      | 0.81420317 | 0.5416899  | 0.12127871 | 0.155678677 | FALSE | FALSE |
| Q5JRA6  | MIA3    | Melanoma inhibitory activity pr    | 0.81246284 | 0.65221111 | 0.16364501 | 0.171674971 | TRUE  | FALSE |
| Q14744  | PRMT5   | Protein arginine N-methyltransf    | 0.80912554 | 0.4419064  | 0.03519649 | 0.094466769 | TRUE  | FALSE |
| P50914  | RPL14   | 60S ribosomal protein L14 OS       | 0.80832958 | 0.66527958 | 0.00395297 | 0.026785133 | FALSE | FALSE |
| P42704  | LRPPRC  | Leucine-rich PPR motif-containi    | 0.80775852 | 0.66720072 | 0.09405632 | 0.140857296 | FALSE | FALSE |
| P61353  | RPL27   | 60S ribosomal protein L27 OS       | 0.8067843  | 0.42745111 | 0.08219796 | 0.132199048 | FALSE | FALSE |
| P26358  | DNMT1   | DNA (cytosine-5)-methyltransfe     | 0.80662666 | 0.06563968 | 0.03659151 | 0.096334348 | FALSE | FALSE |
| P68366  | TUBA4A  | Tubulin alpha-4A chain OS          | 0.80413244 | 0.75327805 | 0.37244478 | 0.248697645 | FALSE | FALSE |
| P62495  | ETF1    | Eukaryotic peptide chain releas    | 0.80358367 | 0.41241832 | 0.07770391 | 0.13003084  | FALSE | FALSE |
| Q7L1Q6  | BZW1    | Basic leucine zipper and W2 dor    | 0.80067306 | 0.60350396 | 0.07676935 | 0.129515641 | FALSE | FALSE |
| Q02818  | NUCB1   | Nucleobindin-1 OS                  | 0.7969115  | 0.68862209 | 0.03647339 | 0.096638908 | TRUE  | FALSE |
| Q96AG4  | LRRCS9  | Leucine-rich repeat-containing f   | 0.79662157 | 0.31724237 | 0.04900991 | 0.107182164 | TRUE  | FALSE |
| Q06830  | PRDX1   | Peroxiredoxin-1 OS                 | 0.79573831 | 0.56754764 | 0.00297127 | 0.022329568 | FALSE | FALSE |
| Q96124  | FUBP3   | Far upstream element-binding f     | 0.795458   | 0.46807423 | 0.25101646 | 0.204641954 | FALSE | FALSE |
| P54136  | RARS    | Arginyl-tRNA synthetase, cytopl    | 0.79483843 | 0.51712544 | 0.27449606 | 0.212468858 | FALSE | FALSE |
| Q9NZZ3  | CHMP5   | Charged multivesicular body pro    | 0.7947858  | 0.51414918 | 0.27311943 | 0.212198053 | FALSE | FALSE |
| P63220  | RPS21   | 40S ribosomal protein S21 OS       | 0.79390225 | 0.37348403 | 0.06649745 | 0.115973053 | FALSE | FALSE |
| P16104  | H2AFX   | Histone H2A.x OS                   | 0.79293613 | 0.23545165 | 0.13175446 | 0.164031662 | FALSE | FALSE |
| P39023  | RPL3    | 60S ribosomal protein L3 OS        | 0.79286315 | 0.73523307 | 0.02906196 | 0.084001935 | FALSE | FALSE |
| Q9H6T3  | RPA3    | RNA polymerase II-associated p     | 0.79235934 | 0.75530277 | 0.37757153 | 0.250100799 | FALSE | FALSE |
| Q14683  | SMC1A   | Structural maintenance of chr      | 0.79101489 | 0.31231069 | 0.01485188 | 0.059026688 | FALSE | FALSE |
| P53621  | COPA    | Coatamer subunit alpha OS          | 0.78684199 | 0.43329281 | 0.03594499 | 0.095853316 | TRUE  | FALSE |
| O75475  | PSIP1   | PC4 and SFRS1-interacting prote    | 0.78563395 | 0.5269297  | 0.05850661 | 0.110929969 | FALSE | FALSE |
| Q9UNE7  | STUB1   | E3 ubiquitin-protein ligase CHIP   | 0.78473192 | 0.5290248  | 0.28318733 | 0.214378683 | TRUE  | FALSE |
| P29692  | EEF1D   | Elongation factor 1-delta OS       | 0.78004575 | 0.43775914 | 0.24049407 | 0.199606859 | TRUE  | FALSE |
| P61803  | DAD1    | Dolichyl-diphosphooligosacchar     | 0.77817672 | 0.81220084 | 0.23888614 | 0.199071785 | TRUE  | FALSE |
| P19105  | MYL12A  | Myosin regulatory light chain 12   | 0.77592142 | 0.71895798 | 0.36925143 | 0.248573164 | FALSE | FALSE |
| P31153  | MAT2A   | S-adenosylmethionine synthase      | 0.77589902 | 0.28058939 | 0.0409344  | 0.100711629 | FALSE | FALSE |
| Q04837  | SSBP1   | Single-stranded DNA-binding pr     | 0.77308058 | 0.31877849 | 0.01672661 | 0.062285257 | FALSE | FALSE |
| P12235  | SLC25A4 | ADP/ATP translocase 1 OS           | 0.77225166 | 0.29735836 | 0.04603612 | 0.105128516 | FALSE | FALSE |
| Q13595  | TRA2A   | Transformer-2 protein homolog      | 0.77147903 | 0.83667268 | 0.41647978 | 0.263218614 | FALSE | FALSE |
| P07195  | LDHB    | L-lactate dehydrogenase B chair    | 0.76796063 | 0.67085944 | 0.01429616 | 0.059090801 | FALSE | FALSE |
| P15586  | GNS     | N-acetylglucosamine-6-sulfatas     | 0.76787665 | 0.5060374  | 0.2776114  | 0.213282613 | FALSE | FALSE |
| Q969T4  | UBE2E3  | Ubiquitin-conjugating enzyme E     | 0.76687213 | 0.29600386 | 0.01395509 | 0.058858189 | FALSE | FALSE |
| P49368  | CCT3    | T-complex protein 1 subunit gar    | 0.76053392 | 0.6818023  | 0.01603883 | 0.060820046 | FALSE | FALSE |
| P18858  | LIG1    | DNA ligase 1 OS                    | 0.75912221 | 0.54113676 | 0.2972305  | 0.220566022 | TRUE  | FALSE |
| Q7L412  | RSRC2   | Arginine/serine-rich coiled-coil   | 0.75758006 | 0.02316072 | 0.0003114  | 0.005148529 | FALSE | FALSE |
| P62750  | RPL23A  | 60S ribosomal protein L23a OS      | 0.75579644 | 0.58952835 | 0.00844097 | 0.044729908 | FALSE | FALSE |
| Q0VDF9  | HSPA14  | Heat shock 70 kDa protein 14 O     | 0.75519048 | 0.33740108 | 0.19480319 | 0.183413785 | FALSE | FALSE |
| P60660  | MYL6    | Myosin light polypeptide 6 OS      | 0.75445426 | 1.0152456  | 0.4841921  | 0.283876219 | FALSE | FALSE |
| P62633  | CNBP    | Cellular nucleic acid-binding pro  | 0.75430188 | 0.38507803 | 0.07697628 | 0.129336844 | TRUE  | FALSE |

|        |          |                                       |            |            |            |             |       |       |
|--------|----------|---------------------------------------|------------|------------|------------|-------------|-------|-------|
| P51149 | RAB7A    | Ras-related protein Rab-7a OS         | 0.75399237 | 0.75191533 | 0.39099908 | 0.254910023 | TRUE  | FALSE |
| O75822 | EIF3J    | Eukaryotic translation initiation     | 0.7531306  | 0.79565775 | 0.24278962 | 0.200706084 | FALSE | FALSE |
| O00330 | PDHX     | Pyruvate dehydrogenase protei         | 0.75296223 | 0.33581193 | 0.06036091 | 0.112383684 | FALSE | FALSE |
| P18621 | RPL17    | 60S ribosomal protein L17 OS          | 0.7517261  | 0.66599154 | 0.01522287 | 0.058804855 | FALSE | FALSE |
| Q16629 | SRSF7    | Serine/arginine-rich splicing fact    | 0.75168092 | 1.03929466 | 0.18113016 | 0.176157956 | FALSE | FALSE |
| P05114 | HMG1     | Non-histone chromosomal prot          | 0.75148299 | 0.69927585 | 0.37049132 | 0.249002294 | FALSE | FALSE |
| Q9NY27 | PPP4R2   | Serine/threonine-protein phosph       | 0.74997712 | 0.46082056 | 0.04731143 | 0.106279289 | FALSE | FALSE |
| P05141 | SLC25A5  | ADP/ATP translocase 2 OS              | 0.74947488 | 0.39044876 | 0.22469571 | 0.193085709 | FALSE | FALSE |
| P06280 | GLA      | Alpha-galactosidase A OS              | 0.7458194  | 0.36622593 | 0.07182163 | 0.122165735 | TRUE  | FALSE |
| P07814 | EPRS     | Bifunctional aminoacyl-tRNA sy        | 0.7441144  | 0.48437947 | 0.05445775 | 0.106678694 | FALSE | FALSE |
| O75396 | SEC22B   | Vesicle-trafficking protein SEC2      | 0.74128718 | 0.73785098 | 0.22396643 | 0.193666927 | TRUE  | FALSE |
| P06733 | ENO1     | Alpha-enolase OS                      | 0.7404633  | 0.47876528 | 0.00085846 | 0.010752485 | FALSE | FALSE |
| O95816 | BAG2     | BAG family molecular chaperon         | 0.74021246 | 0.46528309 | 0.11033188 | 0.152521217 | FALSE | FALSE |
| Q15029 | EFTUD2   | 116 kDa U5 small nuclear ribon        | 0.73974949 | 0.37445375 | 0.21882032 | 0.19202916  | FALSE | FALSE |
| P51572 | BCAP31   | B-cell receptor-associated prote      | 0.73907233 | 0.80837077 | 0.05193787 | 0.104211917 | TRUE  | FALSE |
| P35749 | MYH11    | Myosin-11 OS                          | 0.7365016  | 0.45755729 | 0.26350744 | 0.208652124 | FALSE | FALSE |
| P36659 | DEK      | Protein DEK OS                        | 0.73632843 | 0.57377401 | 0.04548866 | 0.104455435 | FALSE | FALSE |
| Q9Y520 | PRRC2C   | Protein PRRC2C OS                     | 0.72936973 | 0.7238384  | 0.38954488 | 0.25516939  | FALSE | FALSE |
| Q13283 | G3BP1    | Ras GTPase-activating protein-b       | 0.7290195  | 0.40808759 | 0.03747589 | 0.095030889 | FALSE | FALSE |
| Q15366 | PCBP2    | Poly(rC)-binding protein 2 OS         | 0.7274602  | 0.48883135 | 0.01482196 | 0.059479716 | FALSE | FALSE |
| P08238 | HSP90AB1 | Heat shock protein HSP 90-beta        | 0.72539305 | 0.77542614 | 0.01600529 | 0.06125482  | FALSE | FALSE |
| O15372 | EIF3H    | Eukaryotic translation initiation     | 0.72334961 | 0.59840781 | 0.09437325 | 0.140821695 | FALSE | FALSE |
| Q15233 | NONO     | Non-POU domain-containing oc          | 0.72243351 | 0.55029684 | 0.31453206 | 0.227682282 | FALSE | FALSE |
| P47813 | EIF1AX   | Eukaryotic translation initiation     | 0.7216524  | 0.73981735 | 0.09462121 | 0.140179565 | FALSE | FALSE |
| Q99613 | EIF3C    | Eukaryotic translation initiation     | 0.72139624 | 0.34416257 | 0.02475386 | 0.078103794 | FALSE | FALSE |
| Q9Y5B9 | SUPT16H  | FACT complex subunit SPT16 OS         | 0.71830471 | 0.36714663 | 0.01192363 | 0.054760356 | FALSE | FALSE |
| P49189 | ALDH9A1  | 4-trimethylaminobutyraldehyde         | 0.71718775 | 0.45171174 | 0.11070296 | 0.152017351 | FALSE | FALSE |
| Q14203 | DCTN1    | Dynactin subunit 1 OS                 | 0.71642928 | 0.46617875 | 0.27453062 | 0.212098424 | FALSE | FALSE |
| Q6PKG0 | LARP1    | La-related protein 1 OS               | 0.71595985 | 0.60612265 | 0.34339899 | 0.238551682 | FALSE | FALSE |
| P08574 | CYC1     | Cytochrome c1, heme protein, r        | 0.7141107  | 0.3791248  | 0.22862838 | 0.194443886 | FALSE | FALSE |
| P61224 | RAP1B    | Ras-related protein Rap-1b OS         | 0.71383488 | 0.82029445 | 0.43440034 | 0.270003221 | FALSE | FALSE |
| P35268 | RPL22    | 60S ribosomal protein L22 OS          | 0.71359835 | 0.74019975 | 0.02013154 | 0.069924685 | FALSE | FALSE |
| P62241 | RPS8     | 40S ribosomal protein S8 OS           | 0.71091228 | 0.65892667 | 0.00772801 | 0.043165461 | FALSE | FALSE |
| P78527 | PRKDC    | DNA-dependent protein kinase          | 0.70976013 | 0.64075228 | 0.19504756 | 0.1832265   | FALSE | FALSE |
| Q3ZCQ8 | TIMMS50  | Mitochondrial import inner mer        | 0.70949965 | 0.70078304 | 0.38812446 | 0.254642506 | FALSE | FALSE |
| P62249 | RPS16    | 40S ribosomal protein S16 OS          | 0.70872382 | 0.2526916  | 0.00099916 | 0.011471866 | FALSE | FALSE |
| P0CG39 | POTEJ    | POTE ankyrin domain family me         | 0.70768605 | 0.04273561 | 0.02716756 | 0.081965384 | FALSE | FALSE |
| O15371 | EIF3D    | Eukaryotic translation initiation     | 0.70761172 | 0.49372021 | 0.13110769 | 0.164215687 | FALSE | FALSE |
| P18615 | RDBP     | Negative elongation factor E OS       | 0.70736261 | 0.42425466 | 0.255354   | 0.206548574 | FALSE | FALSE |
| P33176 | KIF5B    | Kinesin-1 heavy chain OS              | 0.70530248 | 0.43722284 | 0.10777952 | 0.149996188 | FALSE | FALSE |
| P02452 | COL1A1   | Collagen alpha-1(I) chain OS          | 0.70228602 | 1.92213456 | 0.69638041 | 0.36760822  | TRUE  | FALSE |
| P50991 | CCT4     | T-complex protein 1 subunit del       | 0.70087836 | 0.7078773  | 0.01786191 | 0.065335616 | FALSE | FALSE |
| P61247 | RPS3A    | 40S ribosomal protein S3a OS          | 0.70083575 | 0.77604332 | 0.02668843 | 0.081111898 | FALSE | FALSE |
| Q2NL82 | TSR1     | Pre-rRNA-processing protein TS        | 0.7002721  | 0.44405595 | 0.02431241 | 0.077301004 | FALSE | FALSE |
| P10155 | TROVE2   | 60 kDa SS-A/Ro ribonucleoprote        | 0.70016545 | 0.54334188 | 0.04494708 | 0.103788418 | FALSE | FALSE |
| P17987 | TCP1     | T-complex protein 1 subunit alp       | 0.69975172 | 0.66720696 | 0.0500979  | 0.107290848 | TRUE  | FALSE |
| P35580 | MYH10    | Myosin-10 OS                          | 0.69950502 | 0.62429647 | 0.11086503 | 0.151235025 | FALSE | FALSE |
| Q00341 | HDLBP    | Vigilin OS                            | 0.69814624 | 0.63170959 | 0.1956959  | 0.183003703 | FALSE | FALSE |
| P16403 | HIST1H1C | Histone H1.2 OS                       | 0.69457647 | 0.53541401 | 0.31770676 | 0.228380512 | FALSE | FALSE |
| P42285 | SKIVL2   | Superkiller viralicidic activity 2-li | 0.69296533 | 0.52636466 | 0.3137836  | 0.227538986 | FALSE | FALSE |
| O43809 | NUDT21   | Cleavage and polyadenylation s        | 0.69046605 | 0.40401085 | 0.09768812 | 0.140689051 | FALSE | FALSE |
| P62937 | PIPA     | Peptidyl-prolyl cis-trans isomera     | 0.6902576  | 0.66888629 | 0.02237832 | 0.07283234  | FALSE | FALSE |
| P60866 | RPS20    | 40S ribosomal protein S20 OS          | 0.68750812 | 0.21458227 | 0.00014736 | 0.003806871 | FALSE | FALSE |
| O75534 | CSD1     | Cold shock domain-containing p        | 0.686395   | 0.53227041 | 0.15511424 | 0.16872075  | TRUE  | FALSE |
| P31025 | LCN1     | Lipocalin-1 OS                        | 0.68412911 | 0.31053897 | 0.06232842 | 0.113992987 | FALSE | FALSE |
| Q13895 | BYSL     | Bystin OS                             | 0.68309171 | 0.51828373 | 0.31348632 | 0.228526185 | FALSE | FALSE |
| Q02978 | SLC25A11 | Mitochondrial 2-oxoglutarate/r        | 0.68200637 | 0.55993222 | 0.33485414 | 0.235384995 | FALSE | FALSE |
| P05388 | RPLP0    | 60S acidic ribosomal protein PO       | 0.68096692 | 0.49375129 | 0.07024983 | 0.119985941 | FALSE | FALSE |
| P49327 | FASN     | Fatty acid synthase OS                | 0.68018114 | 0.51886959 | 0.00250145 | 0.020273188 | TRUE  | FALSE |
| O75390 | CS       | Citrate synthase, mitochondrial       | 0.67862882 | 0.36567292 | 0.23175269 | 0.196293258 | FALSE | FALSE |
| P63244 | GNB2L1   | Guanine nucleotide-binding pro        | 0.67834975 | 0.65955129 | 0.01499129 | 0.059013336 | FALSE | FALSE |
| P11586 | MTHFD1   | C-1-tetrahydrofolate synthase, c      | 0.67822378 | 0.28241074 | 0.0058072  | 0.035825495 | FALSE | FALSE |
| Q9NQ39 | RPS10P5  | Putative 40S ribosomal protein        | 0.67814383 | 0.2757187  | 0.05092924 | 0.104211637 | FALSE | FALSE |
| Q14974 | KPNB1    | Importin subunit beta-1 OS            | 0.6770362  | 0.70323974 | 0.04365696 | 0.103706189 | FALSE | FALSE |
| P62851 | RPS25    | 40S ribosomal protein S25 OS          | 0.67497287 | 0.66791279 | 0.03684343 | 0.095777468 | FALSE | FALSE |
| Q9H9B4 | SFXN1    | Sideroflexin-1 OS                     | 0.6749608  | 0.19996284 | 0.02803201 | 0.082761185 | FALSE | FALSE |
| Q8NC51 | SERBP1   | Plasminogen activator inhibitor       | 0.66631804 | 1.07738232 | 0.19022433 | 0.181584423 | FALSE | FALSE |
| Q9HC35 | EML4     | Echinoderm microtubule-associ         | 0.6642952  | 0.48359952 | 0.30264293 | 0.222584364 | FALSE | FALSE |
| P61978 | HNRNPK   | Heterogeneous nuclear ribonuc         | 0.66422803 | 0.19975579 | 0.00174704 | 0.017612459 | FALSE | FALSE |
| Q9Y295 | DRG1     | Developmentally-regulated GTP         | 0.66383525 | 0.48198483 | 0.13979663 | 0.166520482 | FALSE | FALSE |
| Q9UQE7 | SMC3     | Structural maintenance of chror       | 0.66294398 | 0.42152212 | 0.1124768  | 0.152427572 | FALSE | FALSE |
| P05455 | SSB      | Lupus La protein OS                   | 0.66229499 | 0.63764334 | 0.05162986 | 0.104099235 | FALSE | FALSE |
| P21333 | FLNA     | Filamin-A OS                          | 0.66225011 | 0.39521844 | 0.04401598 | 0.103370855 | FALSE | FALSE |
| P40429 | RPL13A   | 60S ribosomal protein L13a OS         | 0.65993934 | 0.63935608 | 0.01474187 | 0.059738312 | FALSE | FALSE |
| Q7L2E3 | DHX30    | Putative ATP-dependent RNA h          | 0.65808727 | 0.54390488 | 0.33669816 | 0.236279413 | FALSE | FALSE |
| P08621 | SNRNP70  | U1 small nuclear ribonucleoprot       | 0.65694109 | 0.93509317 | 0.14589901 | 0.166129269 | FALSE | FALSE |

|        |          |                                   |            |            |            |             |       |       |
|--------|----------|-----------------------------------|------------|------------|------------|-------------|-------|-------|
| P35998 | PSMC2    | 26S protease regulatory subunit   | 0.6543938  | 0.37627519 | 0.09479656 | 0.139937781 | FALSE | FALSE |
| P49411 | TUFM     | Elongation factor Tu, mitochondr  | 0.65331915 | 0.41784707 | 0.05218397 | 0.104199875 | FALSE | FALSE |
| P62847 | RPS24    | 40S ribosomal protein S24 OS      | 0.65211321 | 0.24854792 | 0.01347681 | 0.058635965 | FALSE | FALSE |
| P14618 | PKM2     | Pyruvate kinase isozymes M1/N     | 0.65099656 | 0.53639724 | 0.00658002 | 0.038853443 | FALSE | FALSE |
| P11177 | PDHB     | Pyruvate dehydrogenase E1 con     | 0.64998145 | 0.2431568  | 0.1646324  | 0.172273569 | FALSE | FALSE |
| P00338 | LDHA     | L-lactate dehydrogenase A chain   | 0.64963401 | 0.62476602 | 0.01424136 | 0.059458876 | FALSE | FALSE |
| Q16543 | CDC37    | Hsp90 co-chaperone Cdc37 OS       | 0.64857264 | 0.84962552 | 0.16302562 | 0.171460362 | FALSE | FALSE |
| P04181 | OAT      | Ornithine aminotransferase, mit   | 0.64837653 | 0.2524393  | 0.00049718 | 0.007339292 | FALSE | FALSE |
| Q6P1N0 | CC2D1A   | Coiled-coil and C2 domain-cont    | 0.64803333 | 0.61076106 | 0.37423278 | 0.249488522 | FALSE | FALSE |
| Q9UHB9 | SRP68    | Signal recognition particle 68 kD | 0.64649092 | 0.83752093 | 0.47212423 | 0.281594055 | TRUE  | FALSE |
| Q965B4 | SRPK1    | Serine/threonine-protein kinase   | 0.6459789  | 0.4438426  | 0.12786707 | 0.161626068 | TRUE  | FALSE |
| P34932 | HSPA4    | Heat shock 70 kDa protein 4 OS    | 0.64558174 | 0.42300622 | 0.11825624 | 0.155172214 | FALSE | FALSE |
| P62316 | SNRPD2   | Small nuclear ribonucleoprotein   | 0.64553092 | 0.66869264 | 0.40246612 | 0.258311586 | FALSE | FALSE |
| Q02543 | RPL18A   | 60S ribosomal protein L18a OS     | 0.64371433 | 0.61604366 | 0.02124119 | 0.071379616 | FALSE | FALSE |
| Q9BQE3 | TUBA1C   | Tubulin alpha-1C chain OS         | 0.64051044 | 0.79980587 | 0.14782739 | 0.166945318 | FALSE | FALSE |
| P12268 | IMPDH2   | Inosine-5-<#039>-monophospha      | 0.63983535 | 0.57464841 | 0.11232228 | 0.152718888 | FALSE | FALSE |
| Q9BTE3 | MCM8P    | Mir-chromosome maintenance        | 0.63811058 | 0.48122257 | 0.14848059 | 0.166771672 | FALSE | FALSE |
| P04075 | ALDOA    | Fructose-bisphosphate aldolase    | 0.6373905  | 0.79946171 | 0.04373119 | 0.103288901 | FALSE | FALSE |
| P83731 | RPL24    | 60S ribosomal protein L24 OS      | 0.6346315  | 0.45851178 | 0.13869553 | 0.166166627 | FALSE | FALSE |
| P62888 | RPL30    | 60S ribosomal protein L30 OS      | 0.63440041 | 0.49124806 | 0.00471316 | 0.030439153 | FALSE | FALSE |
| Q9Y266 | NUDC     | Nuclear migration protein nudC    | 0.63287728 | 0.41322211 | 0.06479932 | 0.115447069 | FALSE | FALSE |
| P46776 | RPL27A   | 60S ribosomal protein L27a OS     | 0.63214578 | 0.64955237 | 0.02839601 | 0.083241271 | FALSE | FALSE |
| O60884 | DNAJA2   | DnaJ homolog subfamily A mem      | 0.63068846 | 0.75482678 | 0.44711986 | 0.273791914 | FALSE | FALSE |
| Q722W4 | ZC3HAV1  | Zinc finger CCHH-type antiviral   | 0.62864503 | 0.49500678 | 0.32342867 | 0.230092684 | TRUE  | FALSE |
| Q96AE4 | FUBP1    | Far upstream element-binding p    | 0.6282984  | 0.45132226 | 0.13761657 | 0.166320226 | FALSE | FALSE |
| O75494 | SRSF10   | Serine/arginine-rich splicing fac | 0.62679847 | 0.35666827 | 0.01710876 | 0.063139455 | FALSE | FALSE |
| Q9Y3I0 | C22orf28 | tRNA-splicing ligase RtcB homol   | 0.62535705 | 0.57791804 | 0.36848071 | 0.248458987 | TRUE  | FALSE |
| Q96P70 | IPO9     | Importin-9 OS                     | 0.62261657 | 0.42653332 | 0.13515413 | 0.164789701 | FALSE | FALSE |
| P13010 | XRCC5    | X-ray repair cross-complementi    | 0.62212163 | 0.62656919 | 0.05922701 | 0.110771482 | FALSE | FALSE |
| P29401 | TKT      | Transketolase OS                  | 0.61922654 | 0.46964576 | 0.14981686 | 0.167816535 | FALSE | FALSE |
| O60524 | NEMF     | Nuclear export mediator factor    | 0.6189247  | 0.38809797 | 0.26569055 | 0.209577788 | FALSE | FALSE |
| Q9ULX3 | NOB1     | RNA-binding protein NOB1 OS       | 0.61817885 | 0.62741622 | 0.39628869 | 0.255936448 | FALSE | FALSE |
| Q9Y3F4 | STRAP    | Serine-threonine kinase receptc   | 0.61592344 | 0.41388527 | 0.1232905  | 0.157771119 | FALSE | FALSE |
| Q8N766 | KIAA0090 | Uncharacterized protein KIAA00    | 0.61564728 | 0.59444248 | 0.08150859 | 0.132118499 | FALSE | FALSE |
| Q8IV08 | PLD3     | Phospholipase D3 OS               | 0.61561764 | 0.96842704 | 0.53382771 | 0.305185045 | TRUE  | FALSE |
| Q02790 | FKBP4    | Peptidyl-prolyl cis-trans isomere | 0.61539201 | 0.68169354 | 0.1136805  | 0.153055178 | TRUE  | FALSE |
| Q99623 | PHB2     | Inhibitor-2 OS                    | 0.61262081 | 0.65915305 | 0.02362315 | 0.076283084 | FALSE | FALSE |
| P61019 | RAB2A    | Ras-related protein Rab-2A OS     | 0.61257969 | 0.76403522 | 0.46011275 | 0.277634942 | TRUE  | FALSE |
| O95433 | AHSA1    | Activator of 90 kDa heat shock p  | 0.61101807 | 0.64519003 | 0.1545323  | 0.168531263 | TRUE  | FALSE |
| Q07020 | RPL18    | 60S ribosomal protein L18 OS      | 0.61100127 | 0.73414284 | 0.05078763 | 0.104438903 | FALSE | FALSE |
| O00401 | WASL     | Neural Wiskott-Aldrich syndrom    | 0.6081384  | 0.58293919 | 0.37921868 | 0.250389329 | FALSE | FALSE |
| Q15691 | MAPRE1   | Microtubule-associated protein    | 0.60805241 | 0.52149756 | 0.18087207 | 0.176321827 | TRUE  | FALSE |
| P19338 | NCL      | Nucleolin OS                      | 0.60506549 | 0.58369776 | 0.00955913 | 0.048184249 | FALSE | FALSE |
| O95831 | AIFM1    | Apoptosis-inducing factor 1, mit  | 0.60412463 | 0.44747017 | 0.30714688 | 0.225095819 | FALSE | FALSE |
| P51991 | HNRNPA3  | Heterogeneous nuclear ribonuc     | 0.60293885 | 0.44690957 | 0.14447695 | 0.167274903 | FALSE | FALSE |
| P10809 | HSPD1    | 60 kDa heat shock protein, mito   | 0.60143864 | 0.76143621 | 0.11080828 | 0.151658134 | TRUE  | FALSE |
| O43242 | PSMD3    | 26S proteasome non-ATPase re      | 0.60116427 | 0.80384869 | 0.48217418 | 0.283901228 | FALSE | FALSE |
| P07900 | HSP90AA1 | Heat shock protein HSP 90-alpha   | 0.59857755 | 0.81053104 | 0.05758477 | 0.109685281 | FALSE | FALSE |
| Q9UNF0 | PACSL1   | Protein kinase C and casein kina  | 0.59686553 | 0.48709608 | 0.16782227 | 0.173416342 | FALSE | FALSE |
| P47897 | QARS     | Glutaminyl-tRNA synthetase OS     | 0.59622806 | 0.4742483  | 0.16134684 | 0.170562728 | FALSE | FALSE |
| P61313 | RPL15    | 60S ribosomal protein L15 OS      | 0.59331656 | 0.76938976 | 0.06552959 | 0.115257721 | FALSE | FALSE |
| Q9H2J4 | PDCL3    | Phosducin-like protein 3 OS       | 0.59203326 | 0.49944687 | 0.09843667 | 0.140300547 | FALSE | FALSE |
| O95232 | LUC7L3   | Luc7-like protein 3 OS            | 0.59025347 | 0.65048287 | 0.0371952  | 0.096087601 | FALSE | FALSE |
| P57088 | TMEM33   | Transmembrane protein 33 OS       | 0.59000931 | 0.01258149 | 0.00959855 | 0.04779999  | TRUE  | FALSE |
| P12004 | PCNA     | Proliferating cell nuclear antige | 0.58801333 | 0.34801824 | 0.09962061 | 0.141015469 | FALSE | FALSE |
| Q9UPN6 | SCAF8    | Protein SCAF8 OS                  | 0.58734031 | 0.48686997 | 0.33751851 | 0.236453646 | FALSE | FALSE |
| P53041 | PPP5C    | Serine/threonine-protein phosph   | 0.58678091 | 0.3472513  | 0.25230345 | 0.205286271 | FALSE | FALSE |
| P49916 | LIG3     | DNA ligase 3 OS                   | 0.58670056 | 0.62886984 | 0.41288434 | 0.26214879  | FALSE | FALSE |
| P62906 | RPL10A   | 60S ribosomal protein L10a OS     | 0.5863065  | 0.76317536 | 0.11860054 | 0.155131503 | FALSE | FALSE |
| P56182 | RRP1     | Ribosomal RNA processing prot     | 0.58545586 | 0.19418843 | 0.14666102 | 0.166538154 | FALSE | FALSE |
| P63261 | ACTG1    | Actin, cytoplasmic 2 OS           | 0.58540343 | 0.8211381  | 0.05063442 | 0.105701492 | FALSE | FALSE |
| Q13523 | PRPF4B   | Serine/threonine-protein kinase   | 0.58540168 | 0.47540353 | 0.16657081 | 0.172988112 | FALSE | FALSE |
| Q9UKD2 | MRTO4    | mRNA turnover protein 4 homo      | 0.58501084 | 0.63353529 | 0.05025922 | 0.106532371 | FALSE | FALSE |
| P10515 | DLAT     | Dihydrolipoyllysine-residue acet  | 0.58417385 | 0.13926909 | 0.00355253 | 0.025316882 | FALSE | FALSE |
| P17655 | CAPN2    | Calpain-2 catalytic subunit OS    | 0.58339743 | 0.35637838 | 0.25957613 | 0.207527013 | TRUE  | FALSE |
| Q96MW1 | CCDC43   | Coiled-coil domain-containing p   | 0.57917821 | 0.8110971  | 0.49688188 | 0.289264568 | FALSE | FALSE |
| P12956 | XRCC6    | X-ray repair cross-complementi    | 0.57845304 | 0.62693555 | 0.05039298 | 0.10573147  | FALSE | FALSE |
| Q92542 | NCSTN    | Nicastrin OS                      | 0.57800391 | 0.65678988 | 0.26692121 | 0.209747974 | TRUE  | FALSE |
| P08559 | PDHA1    | Pyruvate dehydrogenase E1 con     | 0.57757067 | 0.35421092 | 0.10583719 | 0.14829165  | FALSE | FALSE |
| P25205 | MCM3     | DNA replication licensing factor  | 0.57666639 | 0.6924218  | 0.05066834 | 0.10524077  | FALSE | FALSE |
| P16402 | HIST1H1D | Histone H1.3 OS                   | 0.57481812 | 0.78589853 | 0.17728556 | 0.174887906 | FALSE | FALSE |
| P22102 | GART     | Trifunctional purine biosyntheti  | 0.57346749 | 0.42380268 | 0.14379614 | 0.167424612 | FALSE | FALSE |
| P10321 | HLA-C    | HLA class I histocompatibility an | 0.57196165 | 0.14058282 | 0.10955036 | 0.151949046 | FALSE | FALSE |
| Q5JSH3 | WDR44    | WD repeat-containing protein 4    | 0.57169666 | 0.56139611 | 0.38638686 | 0.253905514 | TRUE  | FALSE |
| Q72406 | MYH14    | Miosin-14 OS                      | 0.57141402 | 0.99303534 | 0.56513744 | 0.31737791  | FALSE | FALSE |
| P25788 | PSMA3    | Proteasome subunit alpha type-    | 0.57134237 | 0.51897601 | 0.04295564 | 0.102630053 | FALSE | FALSE |

|        |          |                                    |            |            |            |             |       |       |
|--------|----------|------------------------------------|------------|------------|------------|-------------|-------|-------|
| P25789 | PSMA4    | Proteasome subunit alpha type-     | 0.57094594 | 0.58970771 | 0.09635584 | 0.139744145 | FALSE | FALSE |
| Q9NX63 | CHCHD3   | Coiled-coil-helix-coiled-coil-heli | 0.57009311 | 0.29639018 | 0.22427337 | 0.193527474 | FALSE | FALSE |
| P26639 | TARS     | Threonyl-tRNA synthetase, cyto     | 0.56900002 | 0.63765559 | 0.17230914 | 0.173287371 | FALSE | FALSE |
| Q15054 | POLD3    | DNA polymerase delta subunit 3     | 0.5686487  | 0.45590272 | 0.32832532 | 0.232774955 | FALSE | FALSE |
| Q13620 | CUL4B    | Cullin-4B OS                       | 0.56817651 | 0.46462566 | 0.33375595 | 0.235012705 | FALSE | FALSE |
| O75369 | FLNB     | Filamin-B OS                       | 0.56808227 | 0.47837839 | 0.09805675 | 0.140242647 | FALSE | FALSE |
| Q13310 | PABPC4   | Polyadenylate-binding protein 4    | 0.5680745  | 0.34453943 | 0.02107751 | 0.071410153 | FALSE | FALSE |
| P47985 | UQCRFS1  | Cytochrome b-c1 complex subu       | 0.56801664 | 0.25975809 | 0.19910436 | 0.184108429 | FALSE | FALSE |
| P62424 | RPL7A    | 60S ribosomal protein L7a OS       | 0.56757698 | 0.4312823  | 0.07818778 | 0.130312962 | FALSE | FALSE |
| Q08211 | DHX9     | ATP-dependent RNA helicase A       | 0.56689612 | 0.85097891 | 0.27491339 | 0.211603108 | FALSE | FALSE |
| Q92974 | ARHGEF2  | Rho guanine nucleotide exchan      | 0.56500427 | 0.50859018 | 0.36085469 | 0.244915063 | TRUE  | FALSE |
| P61619 | SEC61A1  | Protein transport protein Sec61    | 0.56449928 | 0.05766092 | 0.00029105 | 0.005012579 | FALSE | FALSE |
| P62269 | RPS18    | 40S ribosomal protein S18 OS       | 0.56346943 | 0.52734436 | 0.01250834 | 0.056814451 | FALSE | FALSE |
| P61026 | RAB10    | Ras-related protein Rab-10 OS      | 0.56072845 | 0.56399302 | 0.39357038 | 0.254578652 | TRUE  | FALSE |
| P55072 | VCP      | Transitional endoplasmic reticul   | 0.56072749 | 0.72338917 | 0.08614344 | 0.135383859 | TRUE  | FALSE |
| O00541 | PES1     | Pescadillo homolog OS              | 0.56018667 | 0.19314215 | 0.15223653 | 0.167798482 | FALSE | FALSE |
| Q8WYA6 | CTNNB1   | Beta-catenin-like protein 1 OS     | 0.55949653 | 0.72923719 | 0.47405092 | 0.281524493 | FALSE | FALSE |
| Q14134 | TRIM29   | Tripartite motif-containing prot   | 0.5594463  | 0.52188608 | 0.37122397 | 0.248685966 | FALSE | FALSE |
| P27708 | CAD      | CAD protein OS                     | 0.55889372 | 0.49354533 | 0.06451785 | 0.115945119 | FALSE | FALSE |
| P61163 | ACTR1A   | Alpha-centractin OS                | 0.55863031 | 0.46391898 | 0.3380268  | 0.236409045 | FALSE | FALSE |
| P08579 | SNRPB2   | U2 small nuclear ribonucleoprot    | 0.55760673 | 0.67619337 | 0.13896532 | 0.166008665 | FALSE | FALSE |
| Q9NTJ3 | SMC4     | Structural maintenance of chr      | 0.55752458 | 0.33941359 | 0.25878643 | 0.207296623 | FALSE | FALSE |
| Q43390 | HNRNPR   | Heterogeneous nuclear ribonuc      | 0.5569948  | 0.25942221 | 0.06530523 | 0.115353961 | TRUE  | FALSE |
| Q13409 | DYNC1I2  | Cytoplasmic dynein 1 intermedi     | 0.55515269 | 0.33802172 | 0.10455396 | 0.146991957 | FALSE | FALSE |
| O95104 | SCAF4    | Splicing factor, arginine/serine-r | 0.55366193 | 0.42807467 | 0.31851141 | 0.22856143  | FALSE | FALSE |
| Q9BQ61 | C19orf43 | Uncharacterized protein C19orf     | 0.55342404 | 0.26175057 | 0.20546504 | 0.18462076  | FALSE | FALSE |
| P0CG48 | UBC      | Polyubiquitin-C OS                 | 0.55339841 | 0.21430097 | 0.04652556 | 0.105662435 | FALSE | FALSE |
| Q9NZ18 | IGF2BP1  | Insulin-like growth factor 2 mRN   | 0.55298596 | 0.64986675 | 0.09155771 | 0.139645217 | FALSE | FALSE |
| P83881 | RPL36A   | 60S ribosomal protein L36a OS      | 0.54965921 | 0.63681468 | 0.12581016 | 0.159513908 | FALSE | FALSE |
| Q9UHB6 | LIMA1    | LIM domain and actin-binding p     | 0.54647933 | 0.3158206  | 0.09562791 | 0.139176769 | FALSE | FALSE |
| Q9BQ39 | DDX50    | ATP-dependent RNA helicase DI      | 0.54302003 | 0.54120591 | 0.39082284 | 0.255197644 | FALSE | FALSE |
| P51003 | PAPOLA   | Poly(A) polymerase alpha OS        | 0.54049918 | 0.64550982 | 0.44645164 | 0.274195162 | FALSE | FALSE |
| P51858 | HDBG     | Hepatoma-derived growth fact       | 0.54033414 | 0.77729865 | 0.25863373 | 0.207576584 | FALSE | FALSE |
| Q6P2Q9 | PRPF8    | Pre-mRNA-processing-splicing f     | 0.53813882 | 0.46878611 | 0.18510601 | 0.178762814 | FALSE | FALSE |
| P60228 | EIF3E    | Eukaryotic translation initiation  | 0.53750044 | 0.8257835  | 0.52633534 | 0.302155475 | FALSE | FALSE |
| P30048 | PRDX3    | Thioredoxin-dependent peroxid      | 0.53632467 | 0.72192949 | 0.17201248 | 0.173410956 | FALSE | FALSE |
| P14868 | DARS     | Aspartyl-tRNA synthetase, cyto     | 0.53582599 | 0.53098588 | 0.22260208 | 0.194111518 | FALSE | FALSE |
| P23588 | EIF4B    | Eukaryotic translation initiation  | 0.53270778 | 0.76366028 | 0.14820625 | 0.166917118 | FALSE | FALSE |
| Q96KC8 | DNAJC1   | DnaJ homolog subfamily C mem       | 0.53225486 | 0.74325165 | 0.49596988 | 0.289140878 | TRUE  | FALSE |
| Q7K2F4 | SND1     | Staphylococcal nuclease domair     | 0.5283166  | 0.58996846 | 0.05557608 | 0.107343208 | FALSE | FALSE |
| Q9Y383 | LUC7L2   | Putative RNA-binding protein Lu    | 0.52777765 | 0.70095059 | 0.05381998 | 0.106438236 | FALSE | FALSE |
| P62829 | RPL23    | 60S ribosomal protein L23 OS       | 0.52705611 | 0.44456381 | 0.34236977 | 0.238237103 | FALSE | FALSE |
| Q13610 | PWP1     | Periodic tryptophan protein 1 hi   | 0.52679027 | 0.69611611 | 0.47841617 | 0.282493357 | TRUE  | FALSE |
| Q12906 | ILF3     | Interleukin enhancer-binding fa    | 0.52633144 | 0.52719052 | 0.39231612 | 0.254165093 | FALSE | FALSE |
| O60763 | USO1     | General vesicular transport fact   | 0.52592364 | 0.55548645 | 0.40838185 | 0.260893091 | TRUE  | FALSE |
| P62266 | RPS23    | 40S ribosomal protein S23 OS       | 0.52563454 | 0.6301079  | 0.44762492 | 0.273695708 | FALSE | FALSE |
| Q15907 | RAB11B   | Ras-related protein Rab-11B OS     | 0.52541329 | 0.30636119 | 0.09711035 | 0.140336065 | FALSE | FALSE |
| P09622 | DLD      | Dihydrolipoyl dehydrogenase, n     | 0.52300653 | 0.3670125  | 0.13233171 | 0.164255576 | FALSE | FALSE |
| P04406 | GAPDH    | Glyceraldehyde-3-phosphate de      | 0.52205897 | 0.53099221 | 0.01253752 | 0.056327989 | FALSE | FALSE |
| Q9UBT2 | UBA2     | SUMO-activating enzyme subun       | 0.52201535 | 0.45857061 | 0.35385734 | 0.243362785 | FALSE | FALSE |
| P26599 | PTBP1    | Polypyrimidine tract-binding pr    | 0.51651621 | 0.20885948 | 0.17729629 | 0.174482061 | FALSE | FALSE |
| Q9Y285 | FARSA    | Phenylalanyl-tRNA synthetase a     | 0.51614072 | 0.37585674 | 0.14045772 | 0.166349163 | FALSE | FALSE |
| P32119 | PRDX2    | Peroxiredoxin-2 OS                 | 0.51441444 | 0.52316307 | 0.02725395 | 0.081630189 | FALSE | FALSE |
| O76003 | GLRX3    | Glutaredoxin-3 OS                  | 0.51386342 | 0.44664835 | 0.18450003 | 0.178594881 | FALSE | FALSE |
| Q99735 | MGST2    | Microsomal glutathione S-transf    | 0.51366807 | 0.02190307 | 0.01918916 | 0.068375182 | TRUE  | FALSE |
| P62899 | RPL31    | 60S ribosomal protein L31 OS       | 0.51320131 | 0.43009912 | 0.00719194 | 0.041287076 | FALSE | FALSE |
| Q9NP72 | RAB18    | Ras-related protein Rab-18 OS      | 0.51230279 | 0.63247005 | 0.45688793 | 0.276901776 | TRUE  | FALSE |
| Q9NR31 | SAR1A    | GTP-binding protein SAR1a OS       | 0.50888164 | 0.04809165 | 0.04247886 | 0.102677939 | TRUE  | FALSE |
| Q9BXW9 | FANCD2   | Fanconi anemia group D2 prote      | 0.50795166 | 0.25872858 | 0.22008308 | 0.192728121 | FALSE | FALSE |
| P48643 | CCT5     | T-complex protein 1 subunit ep     | 0.50695131 | 0.64324308 | 0.15280878 | 0.167981286 | FALSE | FALSE |
| P63241 | EIF5A    | Eukaryotic translation initiation  | 0.50514165 | 0.68991639 | 0.13287125 | 0.164431487 | TRUE  | FALSE |
| P00491 | PNP      | Purine nucleoside phosphorylas     | 0.5051264  | 0.48873    | 0.38197936 | 0.25140892  | FALSE | FALSE |
| P78344 | EIF4G2   | Eukaryotic translation initiation  | 0.5050176  | 0.34383178 | 0.28563459 | 0.214658725 | FALSE | FALSE |
| Q9Y619 | TEX264   | Testis-expressed sequence 264      | 0.50435136 | 0.26241831 | 0.22443621 | 0.193264516 | FALSE | FALSE |
| Q13263 | TRIM28   | Transcription intermediary fact    | 0.50367627 | 0.59132038 | 0.27809866 | 0.212865641 | FALSE | FALSE |
| P35579 | MYH9     | Myosin-9 OS                        | 0.50348348 | 0.73222717 | 0.09287039 | 0.139587004 | FALSE | FALSE |
| Q9P287 | BCCIP    | BRCA2 and CDKN1A-interacting       | 0.50040966 | 0.19140537 | 0.16816092 | 0.173332955 | FALSE | FALSE |
| Q9H3P7 | ACBD3    | Golgi resident protein GCP60 OS    | 0.50017392 | 0.51462562 | 0.40041437 | 0.25739441  | TRUE  | FALSE |
| Q7L014 | DDX46    | Probable ATP-dependent RNA h       | 0.4998961  | 0.61545972 | 0.05520715 | 0.107131237 | FALSE | FALSE |
| Q9Y3T9 | NOC2L    | Nucleolar complex protein 2 ho     | 0.4986888  | 0.16557453 | 0.03483689 | 0.094112741 | FALSE | FALSE |
| P25685 | DNAJB1   | DnaJ homolog subfamily B mem       | 0.49852807 | 0.44245297 | 0.35679075 | 0.24375787  | FALSE | FALSE |
| Q9Y230 | RUVBL2   | RuvB-like 2 OS                     | 0.49688544 | 0.45090727 | 0.1965209  | 0.183360357 | FALSE | FALSE |
| P19367 | HK1      | Hexokinase-1 OS                    | 0.49654169 | 0.3528224  | 0.29640942 | 0.220352329 | FALSE | FALSE |
| Q12931 | TRAP1    | Heat shock protein 75 kDa, mitc    | 0.49634354 | 0.414809   | 0.17398502 | 0.173704849 | FALSE | FALSE |
| P49736 | CMC2     | DNA replication licensing factor   | 0.49595367 | 0.74690786 | 0.16477529 | 0.171554457 | FALSE | FALSE |
| Q8TEX9 | IPO4     | Importin-4 OS                      | 0.49507313 | 0.44181804 | 0.19179985 | 0.182666528 | FALSE | FALSE |

|        |           |                                    |            |            |            |              |       |       |
|--------|-----------|------------------------------------|------------|------------|------------|--------------|-------|-------|
| P17844 | DDX5      | Probable ATP-dependent RNA h       | 0.49383458 | 0.4574543  | 0.20243605 | 0.18389795   | FALSE | FALSE |
| Q96D66 | CMBL      | Carboxymethylenebutenolidase       | 0.49328347 | 0.19491047 | 0.04830268 | 0.106765276  | FALSE | FALSE |
| Q9Y262 | EIF3L     | Eukaryotic translation initiation  | 0.49225238 | 0.69505805 | 0.14330734 | 0.168277556  | FALSE | FALSE |
| P63173 | RPL38     | 60S ribosomal protein L38 OS       | 0.48982368 | 0.58014186 | 0.44384249 | 0.273405208  | FALSE | FALSE |
| P60174 | TP1I      | Triosephosphate isomerase OS       | 0.48733003 | 0.58662369 | 0.03739315 | 0.095406403  | FALSE | FALSE |
| P38646 | HSPA9     | Stress-70 protein, mitochondria    | 0.48706456 | 0.6215503  | 0.08350686 | 0.133267056  | FALSE | FALSE |
| P09651 | HNRNPA1   | Heterogeneous nuclear ribonuc      | 0.48679474 | 0.5856426  | 0.05101009 | 0.103862913  | FALSE | FALSE |
| O14617 | AP3D1     | AP-3 complex subunit delta-1 O     | 0.48604377 | 0.957502   | 0.60362514 | 0.331779775  | TRUE  | FALSE |
| Q9UNX3 | RPL26L1   | 60S ribosomal protein L26-like 1   | 0.48273457 | 0.57378009 | 0.06764343 | 0.116497023  | FALSE | FALSE |
| Q14676 | MDC1      | Mediator of DNA damage check       | 0.48061638 | 0.19057349 | 0.17402777 | 0.17332886   | FALSE | FALSE |
| P00558 | PGK1      | Phosphoglycerate kinase 1 OS       | 0.47970343 | 0.47453837 | 0.08664153 | 0.135138987  | FALSE | FALSE |
| O60841 | EIF5B     | Eukaryotic translation initiation  | 0.47964499 | 0.55704215 | 0.08871746 | 0.136319269  | FALSE | FALSE |
| Q92688 | ANP32B    | Acidic leucine-rich nuclear phos   | 0.47936792 | 0.76821439 | 0.12092572 | 0.155709127  | FALSE | FALSE |
| P55884 | EIF3B     | Eukaryotic translation initiation  | 0.4792212  | 0.69506859 | 0.09215612 | 0.139528196  | FALSE | FALSE |
| P22234 | PAICS     | Multifunctional protein ADE2 O     | 0.47791247 | 0.60860184 | 0.06178063 | 0.113999977  | FALSE | FALSE |
| Q96QK1 | VPS35     | Vacuolar protein sorting-associ    | 0.47780009 | 0.73131021 | 0.52514312 | 0.301890345  | FALSE | FALSE |
| P18124 | RPL7      | 60S ribosomal protein L7 OS        | 0.4759195  | 0.72164798 | 0.13162542 | 0.164366087  | FALSE | FALSE |
| Q9UBQ5 | EIF3K     | Eukaryotic translation initiation  | 0.4753143  | 0.783084   | 0.24623497 | 0.201538856  | FALSE | FALSE |
| Q99714 | HSD17B10  | 3-hydroxyacyl-CoA dehydrogen       | 0.47462978 | 0.59392784 | 0.46115132 | 0.277855994  | FALSE | FALSE |
| O43719 | HTATSF1   | HIV Tat-specific factor 1 OS       | 0.47415928 | 0.6704412  | 0.14375274 | 0.167846894  | FALSE | FALSE |
| Q01105 | SET       | Protein SET OS                     | 0.4727788  | 0.75247745 | 0.07819268 | 0.12979776   | TRUE  | FALSE |
| O95218 | ZRANB2    | Zinc finger Ran-binding domain-    | 0.47123748 | 0.18046783 | 0.01365564 | 0.058795104  | FALSE | FALSE |
| Q9P258 | RCC2      | Protein RCC2 OS                    | 0.47056036 | 0.62471968 | 0.05374725 | 0.106805435  | FALSE | FALSE |
| P62857 | RPS28     | 40S ribosomal protein S28 OS       | 0.47048115 | 0.55911381 | 0.04887815 | 0.107462604  | FALSE | FALSE |
| P35606 | COPB2     | Coatomer subunit beta&#039; C      | 0.46990041 | 0.44258447 | 0.12377825 | 0.157906413  | TRUE  | FALSE |
| O15355 | PPM1G     | Protein phosphatase 1G OS          | 0.46897681 | 0.48588446 | 0.02002616 | 0.070148148  | FALSE | FALSE |
| Q8NH88 | PLBD2     | Putative phospholipase B-like 2    | 0.46891464 | 0.31100974 | 0.12066324 | 0.15585668   | FALSE | FALSE |
| P30153 | PPP2R1A   | Serine/threonine-protein phosph    | 0.4687488  | 0.28137552 | 0.10205151 | 0.143963455  | FALSE | FALSE |
| P60842 | EIF4A1    | Eukaryotic initiation factor 4A-I  | 0.46796809 | 0.47255072 | 0.02648623 | 0.081093658  | FALSE | FALSE |
| P59998 | ARPC4     | Actin-related protein 2/3 compl    | 0.46758148 | 0.38717014 | 0.17156695 | 0.173809653  | FALSE | FALSE |
| Q13347 | EIF3I     | Eukaryotic translation initiation  | 0.46699994 | 0.66690522 | 0.14695845 | 0.166418698  | FALSE | FALSE |
| P33992 | MCM5      | DNA replication licensing factor   | 0.46606037 | 0.46160175 | 0.22243645 | 0.194377161  | FALSE | FALSE |
| Q99873 | PRMT1     | Protein arginine N-methyltransf    | 0.46575285 | 0.49486605 | 0.15633314 | 0.168714616  | FALSE | FALSE |
| Q16891 | IMMT      | Mitochondrial inner membrane       | 0.46552612 | 0.00133367 | 0.00128965 | 0.014027722  | FALSE | FALSE |
| P36542 | ATP5C1    | ATP synthase subunit gamma, n      | 0.46372243 | 0.01839278 | 0.00052398 | 0.007219302  | FALSE | FALSE |
| P23246 | SFPQ      | Splicing factor, proline- and glut | 0.46364261 | 0.49505658 | 0.41170456 | 0.262205268  | FALSE | FALSE |
| Q14152 | EIF3A     | Eukaryotic translation initiation  | 0.46310573 | 0.6293714  | 0.0994989  | 0.141327187  | FALSE | FALSE |
| Q02878 | RPL6      | 60S ribosomal protein L6 OS        | 0.46199579 | 0.55330993 | 0.05021964 | 0.106997163  | FALSE | FALSE |
| Q07021 | C1QBP     | Complement component 1 Q su        | 0.4605167  | 0.75787684 | 0.19681102 | 0.18280574   | FALSE | FALSE |
| Q9U110 | EIF2B4    | Translation initiation factor eIF- | 0.45603722 | 0.53604408 | 0.44146712 | 0.272754973  | FALSE | FALSE |
| P33993 | MCM7      | DNA replication licensing factor   | 0.45543273 | 0.66113663 | 0.19832155 | 0.183795757  | FALSE | FALSE |
| P09874 | PARP1     | Poly [ADP-ribose] polymerase 1     | 0.45368533 | 0.77826709 | 0.17393548 | 0.174075868  | FALSE | FALSE |
| Q93008 | USP9X     | Probable ubiquitin carboxyl-terr   | 0.45269903 | 0.67312447 | 0.51594993 | 0.29784819   | FALSE | FALSE |
| Q04917 | YWHAH     | 14-3-3 protein eta OS              | 0.45110916 | 0.72733866 | 0.23776774 | 0.199345506  | FALSE | FALSE |
| P46821 | MAP1B     | Microtubule-associated protein     | 0.45105002 | 0.71780967 | 0.39010898 | 0.255134564  | FALSE | FALSE |
| Q00610 | CLTC      | Clathrin heavy chain 1 OS          | 0.45083036 | 0.76930132 | 0.21063288 | 0.186827445  | FALSE | FALSE |
| P60900 | PSMA6     | Proteasome subunit alpha type-     | 0.45058975 | 0.41269509 | 0.19916628 | 0.183754606  | FALSE | FALSE |
| P27695 | APEX1     | DNA-(apurinic or apyrimidinic si   | 0.44821035 | 0.5054007  | 0.42851624 | 0.267552941  | TRUE  | FALSE |
| P25398 | RPS12     | 40S ribosomal protein S12 OS       | 0.44799741 | 0.64990081 | 0.15211309 | 0.168110718  | FALSE | FALSE |
| P62753 | RPS6      | 40S ribosomal protein S6 OS        | 0.44778577 | 0.57442306 | 0.06327433 | 0.115213168  | FALSE | FALSE |
| O60231 | DHX16     | Putative pre-mRNA-splicing fact    | 0.44701915 | 0.17105636 | 0.16822916 | 0.172971941  | FALSE | FALSE |
| P0C058 | HIST1H2AG | Histone H2A type 1 OS              | 0.44502971 | 0.28821239 | 0.11598258 | 0.153652136  | FALSE | FALSE |
| P37802 | TAGLN2    | Transgelin-2 OS                    | 0.44375208 | 0.72242577 | 0.19275989 | 0.182738736  | FALSE | FALSE |
| P01834 | IGKC      | Ig kappa chain C region OS         | 0.44344737 | 0.90497717 | 0.39934715 | 0.257509345  | FALSE | FALSE |
| P16989 | CSDA      | DNA-binding protein A OS           | 0.44265935 | 0.20232848 | 0.02208854 | 0.072459747  | FALSE | FALSE |
| P06454 | PTMA      | Prothymosin alpha OS               | 0.44221895 | 0.6431658  | 0.11876359 | 0.154854735  | FALSE | FALSE |
| P23396 | RPS3      | 40S ribosomal protein S3 OS        | 0.44074661 | 0.61688438 | 0.0644327  | 0.116297743  | FALSE | FALSE |
| P23528 | CFL1      | Cofilin-1 OS                       | 0.44041968 | 0.95926763 | 0.27010426 | 0.210647349  | FALSE | FALSE |
| P67809 | YBX1      | Nuclease-sensitive element-bin     | 0.43855605 | 0.32960468 | 0.04093273 | 0.101310553  | FALSE | FALSE |
| Q92499 | DDX1      | ATP-dependent RNA helicase DI      | 0.4383884  | 0.49670451 | 0.26594085 | 0.209375653  | FALSE | FALSE |
| P51659 | HSD17B4   | Peroxisomal multifunctional enz    | 0.43740845 | 0.26825306 | 0.04709018 | 0.106360334  | FALSE | FALSE |
| Q16658 | FSCN1     | Fascin OS                          | 0.43473771 | 0.52780965 | 0.45161939 | 0.27491804   | FALSE | FALSE |
| P62280 | RPS11     | 40S ribosomal protein S11 OS       | 0.43424222 | 0.43028792 | 0.13687021 | 0.165903284  | FALSE | FALSE |
| P46782 | RPS5      | 40S ribosomal protein S5 OS        | 0.43415641 | 0.68233118 | 0.11493778 | 0.153746332  | FALSE | FALSE |
| P84098 | RPL19     | 60S ribosomal protein L19 OS       | 0.43401739 | 0.50867713 | 0.06477661 | 0.1159062    | FALSE | FALSE |
| Q16186 | ADRM1     | Proteasomal ubiquitin receptor     | 0.43247065 | 0.66162182 | 0.2822793  | 0.214083384  | FALSE | FALSE |
| Q96GQ7 | DDX27     | Probable ATP-dependent RNA h       | 0.43052818 | 0.18631329 | 0.18904806 | 0.18129899   | FALSE | FALSE |
| Q9H3U1 | UNC45A    | Protein unc-45 homolog A OS        | 0.42974504 | 0.57799186 | 0.48402567 | 0.284181739  | FALSE | FALSE |
| P34897 | SHMT2     | Serine hydroxymethyltransferas     | 0.42596566 | 0.7091471  | 0.20116844 | 0.183553252  | FALSE | FALSE |
| Q15021 | NCAPD2    | Condensin complex subunit 1 O      | 0.42557402 | 0.52907135 | 0.45908642 | 0.277420647  | FALSE | FALSE |
| P20290 | BTF3      | Transcription factor BTF3 OS       | 0.42555077 | 0.75318881 | 0.22496307 | 0.192514981  | FALSE | FALSE |
| Q9NQ29 | LUC7L     | Putative RNA-binding protein Lu    | 0.4239966  | 0.78463747 | 0.17025655 | 0.173331795  | FALSE | FALSE |
| O00159 | MYO1C     | Myosin-Ic OS                       | 0.42290898 | 0.53504253 | 0.46461835 | 0.279537486  | FALSE | FALSE |
| Q92820 | GGH       | Gamma-glutamyl hydrolase OS        | 0.42258224 | 0.49395968 | 0.06424397 | 0.116465668  | FALSE | FALSE |
| P06737 | PYGL      | Glycogen phosphorylase, liver fr   | 0.42070824 | 0.35481674 | 0.34233484 | 0.238614504  | FALSE | FALSE |
| P13807 | GYS1      | Glycogen [starch] synthase, mu     | 0.41978295 | 0.69040903 | 0.54787463 | 0.3111064349 | FALSE | FALSE |

|        |           |                                    |            |            |            |             |       |       |
|--------|-----------|------------------------------------|------------|------------|------------|-------------|-------|-------|
| Q3YEC7 | PARF      | Putative GTP-binding protein Pa    | 0.41803554 | 0.72674161 | 0.26776503 | 0.210011788 | FALSE | FALSE |
| Q14566 | MCM6      | DNA replication licensing factor   | 0.41593916 | 0.5375048  | 0.08655653 | 0.135517799 | FALSE | FALSE |
| O14654 | IRS4      | Insulin receptor substrate 4 OS    | 0.41565629 | 0.48315407 | 0.27466968 | 0.211809955 | FALSE | FALSE |
| Q9BVA1 | TUBB2B    | Tubulin beta-2B chain OS           | 0.41453689 | 0.70208095 | 0.25722656 | 0.206848855 | FALSE | FALSE |
| Q9BSJ8 | ESYT1     | Extended synaptotagmin-1 OS        | 0.41370322 | 0.42105203 | 0.23089702 | 0.195970096 | FALSE | FALSE |
| Q13509 | TUBB3     | Tubulin beta-3 chain OS            | 0.41319629 | 0.70566695 | 0.26057452 | 0.207522415 | FALSE | FALSE |
| O75821 | EIF3G     | Eukaryotic translation initiation  | 0.412887   | 0.78523316 | 0.3048942  | 0.223841803 | FALSE | FALSE |
| Q12905 | ILF2      | Interleukin enhancer-binding fa    | 0.40989945 | 0.63335367 | 0.37882766 | 0.250531362 | FALSE | FALSE |
| Q86V81 | THOC4     | THO complex subunit 4 OS           | 0.40965546 | 0.36096314 | 0.18825265 | 0.180956033 | FALSE | FALSE |
| Q9H1E3 | NUCKS1    | Nuclear ubiquitous casein and c    | 0.40654444 | 0.57498504 | 0.11057388 | 0.152346229 | FALSE | FALSE |
| P50395 | GDI2      | Rab GDP dissociation inhibitor b   | 0.40427444 | 0.37048457 | 0.04419486 | 0.103204581 | TRUE  | FALSE |
| Q9UJZ1 | STOML2    | Stomatin-like protein 2 OS         | 0.40376549 | 0.41489618 | 0.23391991 | 0.196918322 | FALSE | FALSE |
| P25705 | ATPSA1    | ATP synthase subunit alpha, mit    | 0.40344509 | 0.64064985 | 0.09553899 | 0.140033508 | FALSE | FALSE |
| P78386 | KRT85     | Keratin, type II cuticular Hb5 OS  | 0.40187803 | 0.32968185 | 0.16915912 | 0.17349653  | FALSE | FALSE |
| Q13151 | HNRNPA0   | Heterogeneous nuclear ribonuc      | 0.4011527  | 0.47541876 | 0.28136698 | 0.213783734 | FALSE | FALSE |
| P61981 | YWHAG     | 14-3-3 protein gamma OS            | 0.40055808 | 0.75617495 | 0.3017937  | 0.222752494 | FALSE | FALSE |
| P35527 | KRT9      | Keratin, type I cytoskeletal 9 OS  | 0.40027241 | 0.60190979 | 0.06480966 | 0.114969924 | FALSE | FALSE |
| P08243 | ASNS      | Asparagine synthetase [glutami     | 0.39976589 | 0.05507534 | 0.06182276 | 0.113570697 | FALSE | FALSE |
| P21796 | VDAC1     | Voltage-dependent anion-select     | 0.39848406 | 0.149204   | 0.16477164 | 0.171983863 | FALSE | FALSE |
| Q7Z6Z7 | HUWE1     | E3 ubiquitin-protein ligase HUW    | 0.39761605 | 0.76884209 | 0.37705137 | 0.250157141 | FALSE | FALSE |
| P55209 | NAP1L1    | Nucleosome assembly protein 1      | 0.39466963 | 0.66668203 | 0.13796308 | 0.165769596 | FALSE | FALSE |
| Q53EL6 | PDCD4     | Programmed cell death protein      | 0.39447946 | 0.87090973 | 0.63730683 | 0.343442187 | FALSE | FALSE |
| P06493 | CDK1      | Cyclin-dependent kinase 1 OS       | 0.39248041 | 0.60869575 | 0.22281457 | 0.19348044  | FALSE | FALSE |
| P15170 | GSPT1     | Eukaryotic peptide chain releas    | 0.3924762  | 0.30361693 | 0.31865814 | 0.228270422 | FALSE | FALSE |
| Q55SJ5 | HP1BP3    | Heterochromatin protein 1-binc     | 0.39020538 | 0.50412058 | 0.15853642 | 0.169762661 | FALSE | FALSE |
| P52597 | HNRNPF    | Heterogeneous nuclear ribonuc      | 0.39014368 | 0.30542729 | 0.15742318 | 0.169008437 | FALSE | FALSE |
| P09661 | SNRPA1    | U2 small nuclear ribonucleoprot    | 0.38444084 | 0.26654141 | 0.29018375 | 0.216894426 | FALSE | FALSE |
| Q9NR30 | DDX21     | Nucleolar RNA helicase 2 OS        | 0.38399968 | 0.56840724 | 0.15886863 | 0.169678809 | FALSE | FALSE |
| P32969 | RPL9      | 60S ribosomal protein L9 OS        | 0.38231622 | 0.53343548 | 0.08225801 | 0.131782861 | FALSE | FALSE |
| P05204 | HMGN2     | Non-histone chromosomal prot       | 0.38218903 | 0.48272629 | 0.08106722 | 0.131920415 | FALSE | FALSE |
| O60506 | SYNCRIP   | Heterogeneous nuclear ribonuc      | 0.38062037 | 0.56066858 | 0.15722307 | 0.169233169 | TRUE  | FALSE |
| P04083 | ANXA1     | Annexin A1 OS                      | 0.37944486 | 0.82706555 | 0.1807779  | 0.176646648 | FALSE | FALSE |
| Q61N85 | SMEK1     | Serine/threonine-protein phosph    | 0.37875881 | 0.55095022 | 0.35592532 | 0.243569205 | FALSE | FALSE |
| Q96CW6 | SLC7A6OS  | Protein SLC7A6OS OS                | 0.3784848  | 0.16197474 | 0.18707067 | 0.180239033 | FALSE | FALSE |
| P08865 | RPSA      | 40S ribosomal protein SA OS        | 0.37348333 | 0.57822774 | 0.08865632 | 0.136733623 | FALSE | FALSE |
| P39019 | RPS19     | 40S ribosomal protein S19 OS       | 0.37191266 | 0.57620899 | 0.17471521 | 0.173595243 | FALSE | FALSE |
| P62854 | RPS26     | 40S ribosomal protein S26 OS       | 0.37002763 | 0.62721989 | 0.16957885 | 0.173496511 | FALSE | FALSE |
| P42166 | TMPO      | Lamina-associated polypeptide      | 0.36656958 | 0.47729971 | 0.31485306 | 0.227516197 | FALSE | FALSE |
| Q92841 | DDX17     | Probable ATP-dependent RNA h       | 0.36571523 | 0.59755699 | 0.2429777  | 0.200460647 | FALSE | FALSE |
| P52701 | MSH6      | DNA mismatch repair protein M      | 0.36562559 | 0.53162376 | 0.09281355 | 0.140010704 | TRUE  | FALSE |
| Q14CN4 | KRT72     | Keratin, type II cytoskeletal 72 C | 0.36221702 | 0.69594732 | 0.13420086 | 0.164598482 | FALSE | FALSE |
| P52292 | KPNA2     | Importin subunit alpha-2 OS        | 0.35981328 | 0.7096225  | 0.32022447 | 0.228205945 | FALSE | FALSE |
| Q15020 | SART3     | Squamous cell carcinoma antige     | 0.35882637 | 0.9596801  | 0.50886033 | 0.29540581  | FALSE | FALSE |
| P18077 | RPL35A    | 60S ribosomal protein L35a OS      | 0.35813301 | 0.46584425 | 0.47341177 | 0.281955139 | FALSE | FALSE |
| P30041 | PRDX6     | Peroxiredoxin-6 OS                 | 0.353598   | 0.52953594 | 0.20969387 | 0.187604902 | FALSE | FALSE |
| O95347 | SMC2      | Structural maintenance of chrora   | 0.35040816 | 0.57837356 | 0.24696886 | 0.201740045 | FALSE | FALSE |
| O95373 | IPO7      | Importin-7 OS                      | 0.34972386 | 0.33491901 | 0.21223629 | 0.187045483 | FALSE | FALSE |
| O00571 | DDX3X     | ATP-dependent RNA helicase Df      | 0.34924207 | 0.51762709 | 0.15930727 | 0.169708774 | FALSE | FALSE |
| Q9BU76 | MMTAG2    | Multiple myeloma tumor-associ      | 0.34867613 | 0.87561038 | 0.42355566 | 0.265659598 | FALSE | FALSE |
| P30050 | RPL12     | 60S ribosomal protein L12 OS       | 0.34799134 | 0.46452637 | 0.05478961 | 0.106822518 | FALSE | FALSE |
| Q15365 | PCBP1     | Poly(rC)-binding protein 1 OS      | 0.34696382 | 0.68556227 | 0.19539009 | 0.183132053 | FALSE | FALSE |
| P50402 | EMD       | Emerin OS                          | 0.34642755 | 0.61301501 | 0.2248773  | 0.192840841 | TRUE  | FALSE |
| P27482 | CALML3    | Calmodulin-like protein 3 OS       | 0.34362147 | 0.20778084 | 0.2572249  | 0.207250734 | FALSE | FALSE |
| Q9BRS2 | RIOK1     | Serine/threonine-protein kinase    | 0.34297686 | 0.58999077 | 0.26348764 | 0.209036899 | FALSE | FALSE |
| P11388 | TOP2A     | DNA topoisomerase 2-alpha OS       | 0.34274929 | 0.71564371 | 0.29357358 | 0.219032036 | FALSE | FALSE |
| Q8WUA2 | PPIL4     | Peptidyl-prolyl cis-trans isomera  | 0.34247547 | 0.35011609 | 0.23229973 | 0.196354234 | FALSE | FALSE |
| P16383 | TCF9      | GC-rich sequence DNA-binding f     | 0.3406649  | 0.31376545 | 0.2007774  | 0.183601748 | FALSE | FALSE |
| P50995 | ANXA11    | Annexin A11 OS                     | 0.34054596 | 0.25931748 | 0.07856244 | 0.129889903 | FALSE | FALSE |
| P61221 | ABCE1     | ATP-binding cassette sub-family    | 0.34028519 | 0.47951933 | 0.34401024 | 0.238575331 | FALSE | FALSE |
| P31946 | YWHAB     | 14-3-3 protein beta/alpha OS       | 0.33951989 | 0.82447694 | 0.35941133 | 0.245143043 | FALSE | FALSE |
| Q15393 | SF3B3     | Splicing factor 3B subunit 3 OS    | 0.33929594 | 0.64011764 | 0.21036302 | 0.187392348 | FALSE | FALSE |
| P01034 | CST3      | Cystatin-C OS                      | 0.33897171 | 0.44755114 | 0.47814947 | 0.282739791 | TRUE  | FALSE |
| Q9NV17 | ATAD3A    | ATPase family AAA domain-cont      | 0.33825713 | 0.22793577 | 0.12385777 | 0.157521683 | FALSE | FALSE |
| Q9BQA1 | WDR77     | Methylosome protein 50 OS          | 0.33733117 | 0.48346744 | 0.19373377 | 0.183241703 | TRUE  | FALSE |
| P33991 | MCM4      | DNA replication licensing factor   | 0.33723863 | 0.60076347 | 0.27772892 | 0.212977029 | FALSE | FALSE |
| P23527 | HIST1H2BO | Histone H2B type 1-O OS            | 0.33551116 | 0.37545908 | 0.4261615  | 0.266485257 | FALSE | FALSE |
| O00267 | SUPT5H    | Transcription elongation factor    | 0.33458509 | 0.48559312 | 0.11813079 | 0.155501251 | FALSE | FALSE |
| Q9Y265 | RUVBL1    | RuvB-like 1 OS                     | 0.3335157  | 0.56267184 | 0.41252861 | 0.262325887 | TRUE  | FALSE |
| P16435 | POR       | NADPH--cytochrome P450 redu        | 0.33278888 | 0.64794154 | 0.46754387 | 0.280074592 | TRUE  | FALSE |
| Q00839 | HNRNPU    | Heterogeneous nuclear ribonuc      | 0.33259864 | 0.63550976 | 0.25607947 | 0.206730825 | FALSE | FALSE |
| P14923 | JUP       | Junction plakoglobin OS            | 0.33162833 | 0.60432075 | 0.19673783 | 0.183149331 | FALSE | FALSE |
| Q08945 | SSRP1     | FACT complex subunit SSRP1 OS      | 0.3302253  | 0.94031852 | 0.47619713 | 0.281988749 | FALSE | FALSE |
| P17812 | CTPS      | CTP synthase 1 OS                  | 0.3296644  | 0.55311403 | 0.20413311 | 0.184224928 | FALSE | FALSE |
| Q13765 | NACA      | Nascent polypeptide-associated     | 0.32622734 | 0.49976726 | 0.0858867  | 0.136014694 | FALSE | FALSE |
| Q9UKK9 | NUDT5     | ADP-sugar pyrophosphatase OS       | 0.32622609 | 0.88549427 | 0.58871846 | 0.326188959 | FALSE | FALSE |
| P55010 | EIF5      | Eukaryotic translation initiation  | 0.32037528 | 0.9233843  | 0.53764009 | 0.306516652 | FALSE | FALSE |



|        |          |                                    |            |            |            |             |       |       |
|--------|----------|------------------------------------|------------|------------|------------|-------------|-------|-------|
| Q15185 | PTGES3   | Prostaglandin E synthase 3 OS      | 0.31780013 | 0.62592563 | 0.19412488 | 0.183192428 | FALSE | FALSE |
| P26368 | U2AF2    | Splicing factor U2AF 65 kDa sub    | 0.31694913 | 0.88706102 | 0.38098447 | 0.251154035 | FALSE | FALSE |
| P35232 | PHB      | Prohibitin OS                      | 0.31523563 | 0.64418854 | 0.28436565 | 0.214877154 | FALSE | FALSE |
| P07339 | CTSD     | Cathepsin D OS                     | 0.31128517 | 0.85958183 | 0.37500058 | 0.249196526 | FALSE | FALSE |
| P11940 | PABPC1   | Polyadenylate-binding protein 1    | 0.31071826 | 0.76604297 | 0.41571392 | 0.263136939 | FALSE | FALSE |
| Q16531 | DDB1     | DNA damage-binding protein 1       | 0.30849184 | 0.66117558 | 0.41957303 | 0.264768729 | FALSE | FALSE |
| O43865 | AHCYL1   | Putative adenosylhomocysteina      | 0.30638741 | 0.55521573 | 0.28476918 | 0.214789407 | TRUE  | FALSE |
| Q724V5 | HDFGRP2  | Hepatoma-derived growth fact       | 0.30614729 | 0.61736861 | 0.48089908 | 0.283554381 | FALSE | FALSE |
| O00303 | EIF3F    | Eukaryotic translation initiation  | 0.30614452 | 0.66127845 | 0.42278313 | 0.265578053 | FALSE | FALSE |
| O94992 | HEXIM1   | Protein HEXIM1 OS                  | 0.30422759 | 0.17581611 | 0.09562539 | 0.139664888 | FALSE | FALSE |
| P40926 | MDH2     | Malate dehydrogenase, mitoch       | 0.30304189 | 0.62312061 | 0.24560805 | 0.201424595 | FALSE | FALSE |
| P28074 | PSMB5    | Proteasome subunit beta type-5     | 0.30226963 | 0.42867076 | 0.14471006 | 0.167076795 | FALSE | FALSE |
| P05787 | KRT8     | Keratin, type II cytoskeletal 8 OS | 0.30221294 | 0.52252421 | 0.14587858 | 0.166564859 | FALSE | FALSE |
| Q9UHX1 | PUF60    | Poly(U)-binding-splicing factor P  | 0.29893068 | 0.56745784 | 0.21282617 | 0.18716628  | FALSE | FALSE |
| P08758 | ANXA5    | Annexin A5 OS                      | 0.29837176 | 0.6017081  | 0.17516685 | 0.173626618 | FALSE | FALSE |
| Q5T749 | KPRP     | Keratinocyte proline-rich protei   | 0.29624316 | 0.44894424 | 0.0665406  | 0.11556071  | FALSE | FALSE |
| Q9BQG0 | MYBBP1A  | Myb-binding protein 1A OS          | 0.29458255 | 0.6985204  | 0.6576427  | 0.352105763 | FALSE | FALSE |
| Q15181 | PPA1     | Inorganic pyrophosphatase OS       | 0.29329433 | 0.98054051 | 0.74523371 | 0.381225165 | FALSE | FALSE |
| P04264 | KRT1     | Keratin, type II cytoskeletal 1 OS | 0.29251866 | 0.57995089 | 0.14517519 | 0.167146927 | FALSE | FALSE |
| P10599 | TXN      | Thioredoxin OS                     | 0.29045611 | 0.54853828 | 0.15082978 | 0.168494528 | FALSE | FALSE |
| P49959 | MRE11A   | Double-strand break repair prot    | 0.2897829  | 0.29873692 | 0.23494569 | 0.197379849 | FALSE | FALSE |
| P08779 | KRT16    | Keratin, type I cytoskeletal 16 O  | 0.28949874 | 0.52293875 | 0.11392964 | 0.152892595 | FALSE | FALSE |
| P20073 | ANXA7    | Annexin A7 OS                      | 0.28919717 | 0.47745484 | 0.16015486 | 0.169736773 | TRUE  | FALSE |
| Q86VP6 | CAND1    | Cullin-associated NEDD8-dissoci    | 0.28704625 | 0.66645967 | 0.45236268 | 0.274965548 | TRUE  | FALSE |
| Q72794 | KRT77    | Keratin, type II cytoskeletal 1b C | 0.28538885 | 0.47756943 | 0.09137517 | 0.139882981 | FALSE | FALSE |
| Q9NTK5 | OLA1     | Obg-like ATPase 1 OS               | 0.28424893 | 0.33456155 | 0.44188293 | 0.272604395 | FALSE | FALSE |
| P48637 | GSS      | Glutathione synthetase OS          | 0.28419229 | 0.15909185 | 0.23995205 | 0.199557711 | FALSE | FALSE |
| Q86Y23 | HRNR     | Hornerin OS                        | 0.28259493 | 0.40490385 | 0.0696063  | 0.119380096 | FALSE | FALSE |
| P19012 | KRT15    | Keratin, type I cytoskeletal 15 O  | 0.27819655 | 0.61984482 | 0.27992159 | 0.213470336 | FALSE | FALSE |
| Q14498 | RBM39    | RNA-binding protein 39 OS          | 0.27790807 | 0.70583308 | 0.30220716 | 0.222660056 | FALSE | FALSE |
| Q8TEA8 | DTD1     | D-tyrosyl-tRNA(Tyr) deacylase 1    | 0.27762053 | 0.21220498 | 0.3154539  | 0.227156121 | FALSE | FALSE |
| P02533 | KRT14    | Keratin, type I cytoskeletal 14 O  | 0.27710251 | 0.5335853  | 0.13495626 | 0.165035265 | FALSE | FALSE |
| Q9NQC3 | RTN4     | Reticulon-4 OS                     | 0.27603601 | 0.77747527 | 0.70376182 | 0.369147488 | TRUE  | FALSE |
| Q9NVV4 | CDK12    | Cyclin-dependent kinase 12 OS      | 0.27332385 | 0.22805433 | 0.33933607 | 0.23692383  | FALSE | FALSE |
| Q13813 | SPTAN1   | Spectrin alpha chain, brain OS     | 0.27332166 | 0.31012421 | 0.43045228 | 0.268356372 | FALSE | FALSE |
| O00410 | IPOS     | Impartin-5 OS                      | 0.27175632 | 0.60724374 | 0.51935889 | 0.299397964 | TRUE  | FALSE |
| P36578 | RPL4     | 60S ribosomal protein L4 OS        | 0.27023136 | 0.71241244 | 0.35432153 | 0.242873795 | FALSE | FALSE |
| Q96854 | ZNF428   | Zinc finger protein 428 OS         | 0.26765223 | 0.63414113 | 0.34859279 | 0.240542608 | FALSE | FALSE |
| O43684 | BUB3     | Mitotic checkpoint protein BUB3    | 0.26164138 | 0.97759126 | 0.76964915 | 0.388901769 | FALSE | FALSE |
| Q99497 | PARK7    | Protein DJ-1 OS                    | 0.2610203  | 0.26067281 | 0.39142685 | 0.254787034 | TRUE  | FALSE |
| Q04695 | KRT17    | Keratin, type I cytoskeletal 17 O  | 0.25859347 | 0.59404577 | 0.20192089 | 0.183833993 | FALSE | FALSE |
| Q8N1N4 | KRT78    | Keratin, type II cytoskeletal 78 C | 0.25649852 | 0.48693267 | 0.13011159 | 0.163463398 | FALSE | FALSE |
| O43847 | NRD1     | Nardilysin OS                      | 0.25461209 | 0.64661503 | 0.48846331 | 0.285166906 | FALSE | FALSE |
| P36915 | GNL1     | Guanine nucleotide-binding pro     | 0.25367781 | 0.55701143 | 0.23863976 | 0.199671595 | FALSE | FALSE |
| P12035 | KRT3     | Keratin, type II cytoskeletal 3 OS | 0.25196681 | 0.46238126 | 0.14073106 | 0.166196683 | FALSE | FALSE |
| O43707 | ACTN4    | Alpha-actinin-4 OS                 | 0.2518476  | 0.40032625 | 0.18395233 | 0.178482699 | FALSE | FALSE |
| P26196 | DDX6     | Probable ATP-dependent RNA h       | 0.25033233 | 0.75606167 | 0.62420883 | 0.338590966 | FALSE | FALSE |
| P27348 | YWHAQ    | 14-3-3 protein theta OS            | 0.24977716 | 0.89937528 | 0.45790799 | 0.27711367  | FALSE | FALSE |
| Q13242 | SRSF9    | Serine/arginine-rich splicing fact | 0.24845168 | 0.84006637 | 0.54455585 | 0.309605346 | FALSE | FALSE |
| P43246 | MSH2     | DNA mismatch repair protein M      | 0.24586519 | 0.51669227 | 0.29635951 | 0.220712188 | FALSE | FALSE |
| Q9Y3U8 | RPL36    | 60S ribosomal protein L36 OS       | 0.24559871 | 0.95792475 | 0.7004148  | 0.368795903 | FALSE | FALSE |
| P48668 | KRT6C    | Keratin, type II cytoskeletal 6C C | 0.24522136 | 0.53401163 | 0.27002427 | 0.210983044 | FALSE | FALSE |
| O75223 | GGCT     | Gamma-glutamylcyclotransfera       | 0.24433453 | 0.76383993 | 0.46878493 | 0.280006415 | FALSE | FALSE |
| P02538 | KRT6A    | Keratin, type II cytoskeletal 6A C | 0.24349682 | 0.44501787 | 0.11763375 | 0.155341687 | FALSE | FALSE |
| P13647 | KRT5     | Keratin, type II cytoskeletal 5 OS | 0.24201384 | 0.45936415 | 0.13005944 | 0.163896047 | FALSE | FALSE |
| P15924 | DSP      | Desmoplakin OS                     | 0.23922734 | 0.48307122 | 0.15178335 | 0.169102748 | FALSE | FALSE |
| P62805 | HIST1H4A | Histone H4 OS                      | 0.2369739  | 0.90759671 | 0.45601116 | 0.276776232 | FALSE | FALSE |
| Q99848 | EBNA1BP2 | Probable rRNA-processing prote     | 0.23687995 | 0.24880203 | 0.24091134 | 0.199552481 | FALSE | FALSE |
| O95678 | KRT75    | Keratin, type II cytoskeletal 75 C | 0.23661682 | 0.47140599 | 0.17053444 | 0.173188131 | FALSE | FALSE |
| Q9H814 | PHAX     | Phosphorylated adapter RNA ex      | 0.23613428 | 0.58929565 | 0.37140971 | 0.248407788 | FALSE | FALSE |
| Q9UGP8 | SEC63    | Translocation protein SEC63 hor    | 0.23381341 | 0.73356644 | 0.63635619 | 0.343826436 | TRUE  | FALSE |
| Q8WU90 | ZC3H15   | Zinc finger CCCH domain-contai     | 0.23371249 | 0.30771611 | 0.31890801 | 0.227660296 | FALSE | FALSE |
| Q8NE71 | ABCF1    | ATP-binding cassette sub-family    | 0.23190773 | 0.46507346 | 0.32731537 | 0.232457653 | FALSE | FALSE |
| P62258 | YWHAE    | 14-3-3 protein epsilon OS          | 0.23006111 | 0.60311426 | 0.28555426 | 0.214989241 | FALSE | FALSE |
| P04259 | KRT6B    | Keratin, type II cytoskeletal 6B C | 0.22929209 | 0.44334811 | 0.13637859 | 0.16579358  | FALSE | FALSE |
| Q99733 | NAP1L4   | Nucleosome assembly protein 1      | 0.22466233 | 0.59625872 | 0.44692581 | 0.274079135 | FALSE | FALSE |
| P63104 | YWHAZ    | 14-3-3 protein zeta/delta OS       | 0.22423515 | 0.68417905 | 0.35429149 | 0.243256615 | FALSE | FALSE |
| P28072 | PSMB6    | Proteasome subunit beta type-6     | 0.22366531 | 0.56514485 | 0.4864427  | 0.284388941 | TRUE  | FALSE |
| Q13838 | DDX39B   | Spliceosome RNA helicase DDX3      | 0.2199384  | 0.63686117 | 0.4830753  | 0.284027204 | FALSE | FALSE |
| O60437 | PPL      | Periplakin OS                      | 0.21814592 | 0.50066886 | 0.5292064  | 0.303382311 | FALSE | FALSE |
| Q9P2J5 | LARS     | Leucyl-tRNA synthetase, cytopla    | 0.2180299  | 1.02468817 | 0.81392039 | 0.406304862 | FALSE | FALSE |
| Q5XKE5 | KRT79    | Keratin, type II cytoskeletal 79 C | 0.21788343 | 0.5295042  | 0.3597471  | 0.244967821 | FALSE | FALSE |
| P08133 | ANXA6    | Annexin A6 OS                      | 0.2176778  | 0.53281821 | 0.28578844 | 0.21438455  | FALSE | FALSE |
| Q9UHV9 | PFDN2    | Prefoldin subunit 2 OS             | 0.21702594 | 0.47924814 | 0.43186314 | 0.268830472 | FALSE | FALSE |
| Q01658 | DR1      | Protein Dr1 OS                     | 0.21471758 | 0.58589967 | 0.41049661 | 0.261839404 | FALSE | FALSE |
| P12429 | ANXA3    | Annexin A3 OS                      | 0.21434577 | 0.57272269 | 0.36031619 | 0.244951798 | FALSE | FALSE |

|        |           |                                     |            |            |            |             |       |       |
|--------|-----------|-------------------------------------|------------|------------|------------|-------------|-------|-------|
| P18887 | XRCC1     | DNA repair protein XRCC1 OS         | 0.21356832 | 1.15662006 | 0.77942266 | 0.391923801 | FALSE | FALSE |
| Q9H8Y5 | ANKZF1    | Ankyrin repeat and zinc finger d    | 0.21247265 | 0.47419456 | 0.64043213 | 0.344677013 | FALSE | FALSE |
| Q9BRX2 | PELO      | Protein pelota homolog OS           | 0.21236492 | 0.64427235 | 0.55682784 | 0.31442009  | FALSE | FALSE |
| P12277 | KKB       | Creatine kinase B-type OS           | 0.21149387 | 0.54790589 | 0.34652568 | 0.239917278 | FALSE | FALSE |
| Q86Y46 | KRT73     | Keratin, type II cytoskeletal 73 C  | 0.21103381 | 0.53964231 | 0.27446526 | 0.212843602 | FALSE | FALSE |
| Q08188 | TGM3      | Protein-glutamine gamma-gluta       | 0.21000967 | 0.50030145 | 0.24342118 | 0.200426469 | FALSE | FALSE |
| P05089 | ARG1      | Arginase-1 OS                       | 0.20930334 | 0.47552137 | 0.22320399 | 0.19341226  | FALSE | FALSE |
| P05387 | RPLP2     | 60S acidic ribosomal protein P2     | 0.20910161 | 0.56307367 | 0.32845747 | 0.232469896 | FALSE | FALSE |
| Q13371 | PDCL      | Phosducin-like protein OS           | 0.20902574 | 0.65937101 | 0.57111108 | 0.319430644 | FALSE | FALSE |
| Q13510 | ASAH1     | Acid ceramidase OS                  | 0.2084045  | 0.54501988 | 0.39194521 | 0.254723301 | FALSE | FALSE |
| P39687 | ANP32A    | Acidic leucine-rich nuclear phos    | 0.20723708 | 0.73138362 | 0.44922557 | 0.274268688 | TRUE  | FALSE |
| P31943 | HNRNPH1   | Heterogeneous nuclear ribonuc       | 0.20696469 | 0.45410831 | 0.31501575 | 0.227236495 | FALSE | FALSE |
| Q05519 | SRSF11    | Serine/arginine-rich splicing fact  | 0.20271563 | 0.54017208 | 0.40014253 | 0.257620322 | FALSE | FALSE |
| P16949 | STMN1     | Stathmin OS                         | 0.20212357 | 0.84175693 | 0.7178607  | 0.376065596 | FALSE | FALSE |
| P52272 | HNRNPM    | Heterogeneous nuclear ribonuc       | 0.20120926 | 0.38497924 | 0.59478308 | 0.328229201 | FALSE | FALSE |
| P25786 | PSMA1     | Proteasome subunit alpha type-      | 0.200695   | 0.36292346 | 0.43923194 | 0.272596402 | FALSE | FALSE |
| P40925 | MDH1      | Malate dehydrogenase, cytopla:      | 0.20016643 | 0.54081655 | 0.56097354 | 0.31632887  | FALSE | FALSE |
| Q13144 | EIF2B5    | Translation initiation factor eIF-  | 0.19657819 | 0.69418165 | 0.61075045 | 0.333038942 | FALSE | FALSE |
| O75643 | SNRNP200  | U5 small nuclear ribonucleoprot     | 0.1956824  | 0.65475586 | 0.59213473 | 0.327642598 | FALSE | FALSE |
| P06753 | TPM3      | Tropomyosin alpha-3 chain OS        | 0.19420866 | 0.59964823 | 0.42440654 | 0.265789953 | FALSE | FALSE |
| Q9BXP5 | SRRT      | Serrate RNA effector molecule f     | 0.19412224 | 0.54806146 | 0.34979457 | 0.24096959  | FALSE | FALSE |
| Q9BTT0 | ANP32E    | Acidic leucine-rich nuclear phos    | 0.1936662  | 0.57138324 | 0.40439065 | 0.259144398 | FALSE | FALSE |
| P35908 | KRT2      | Keratin, type II cytoskeletal 2 ep  | 0.19325758 | 0.44195695 | 0.20007038 | 0.184177634 | TRUE  | FALSE |
| Q13435 | SF3B2     | Splicing factor 3B subunit 2 OS     | 0.19098785 | 1.09362721 | 0.84585606 | 0.417208238 | FALSE | FALSE |
| Q5D862 | FLG2      | Flaggrin-2 OS                       | 0.18942374 | 0.47068214 | 0.26178462 | 0.208085214 | FALSE | FALSE |
| P00505 | GOT2      | Aspartate aminotransferase, mi      | 0.18637777 | 0.50741339 | 0.51578447 | 0.298169111 | FALSE | FALSE |
| O14818 | PSMA7     | Proteasome subunit alpha type-      | 0.18189696 | 0.66844081 | 0.53457298 | 0.305188994 | FALSE | FALSE |
| P29083 | GTF2E1    | General transcription factor IIE :  | 0.17906609 | 0.74788642 | 0.71860882 | 0.375980986 | FALSE | FALSE |
| P62158 | CALM1     | Calmodulin OS                       | 0.17829775 | 0.802896   | 0.68702735 | 0.365001679 | FALSE | FALSE |
| P01040 | CSTA      | Cystatin-A OS                       | 0.17579622 | 0.77080768 | 0.56832999 | 0.318737757 | FALSE | FALSE |
| P61289 | PSME3     | Proteasome activator complex s      | 0.1740641  | 1.02591376 | 0.75672349 | 0.384722069 | FALSE | FALSE |
| Q86VR2 | FAM134C   | Protein FAM134C OS                  | 0.17373987 | 0.66373327 | 0.63682149 | 0.343628653 | FALSE | FALSE |
| P22314 | UBA1      | Ubiquitin-like modifier-activatin   | 0.17330971 | 0.48175238 | 0.466243   | 0.279700688 | FALSE | FALSE |
| P19623 | SRM       | Spermidine synthase OS              | 0.17235108 | 0.75578068 | 0.73099938 | 0.377211501 | FALSE | FALSE |
| P12036 | NEFH      | Neurofilament heavy polypeptic      | 0.17110574 | 0.51817176 | 0.55616559 | 0.314475756 | FALSE | FALSE |
| Q7L576 | CYFIP1    | Cytoplasmic FMR1-interacting p      | 0.17028286 | 0.76958057 | 0.73843848 | 0.379156819 | FALSE | FALSE |
| P05109 | S100A8    | Protein S100-A8 OS                  | 0.16568911 | 0.45298272 | 0.69609211 | 0.367925923 | FALSE | FALSE |
| Q9H6Z4 | RANBP3    | Ran-binding protein 3 OS            | 0.16492367 | 0.92354542 | 0.7863396  | 0.393964084 | FALSE | FALSE |
| Q9GZP4 | PITHD1    | PITH domain-containing protein      | 0.16490631 | 0.50249641 | 0.62706642 | 0.339695223 | FALSE | FALSE |
| P52657 | GTF2A2    | Transcription initiation factor II/ | 0.16448738 | 0.69186113 | 0.66691325 | 0.35614661  | FALSE | FALSE |
| P81605 | DCD       | Dermcidin OS                        | 0.16160405 | 0.33374834 | 0.1600788  | 0.170092297 | FALSE | FALSE |
| P00367 | GLUD1     | Glutamate dehydrogenase 1, mi       | 0.15965548 | 0.19272757 | 0.44981622 | 0.274224245 | FALSE | FALSE |
| Q9BXJ9 | NAA15     | N-alpha-acetyltransferase 15, N     | 0.15786287 | 0.23237484 | 0.51274536 | 0.297243685 | FALSE | FALSE |
| Q969Q0 | RPL36AL   | 60S ribosomal protein L36a-like     | 0.15705332 | 1.30149664 | 0.89239425 | 0.433438651 | FALSE | FALSE |
| P14735 | IDE       | Insulin-degrading enzyme OS         | 0.1545248  | 0.45091625 | 0.61299587 | 0.333383721 | FALSE | FALSE |
| Q9UDY2 | TJP2      | Tight junction protein ZO-2 OS      | 0.1539427  | 0.53845914 | 0.60749863 | 0.33214211  | FALSE | FALSE |
| Q8TBB5 | KLHDC4    | Kelch domain-containing protei      | 0.15262195 | 0.58428012 | 0.69529331 | 0.367974264 | FALSE | FALSE |
| Q9Y4E8 | USP15     | Ubiquitin carboxyl-terminal hyd     | 0.15096423 | 0.8803839  | 0.79446994 | 0.397074861 | FALSE | FALSE |
| P06748 | NPM1      | Nucleophosmin OS                    | 0.14873736 | 0.73271715 | 0.58383323 | 0.323916422 | FALSE | FALSE |
| Q9HCY8 | S100A14   | Protein S100-A14 OS                 | 0.14536522 | 0.33814599 | 0.65224768 | 0.349670178 | FALSE | FALSE |
| P15311 | EZR       | Ezrin OS                            | 0.14097487 | 0.57240964 | 0.61114543 | 0.332815251 | FALSE | FALSE |
| P07910 | HNRNPC    | Heterogeneous nuclear ribonuc       | 0.14006628 | 0.48818941 | 0.66848054 | 0.356522954 | FALSE | FALSE |
| P30837 | ALDH1B1   | Aldehyde dehydrogenase X, mit       | 0.13897552 | 0.44909895 | 0.64559755 | 0.347005188 | FALSE | FALSE |
| Q8N9N8 | EIF1AD    | Probable RNA-binding protein E      | 0.13841037 | 0.43774731 | 0.47364982 | 0.281691017 | FALSE | FALSE |
| Q7Z3Y7 | KRT28     | Keratin, type I cytoskeletal 28 O   | 0.13797065 | 0.22402374 | 0.15433988 | 0.168766714 | FALSE | FALSE |
| P13645 | KRT10     | Keratin, type I cytoskeletal 10 O   | 0.1363903  | 0.46134975 | 0.37425639 | 0.249102483 | FALSE | FALSE |
| P42167 | TMPO      | Lamina-associated polypeptide       | 0.1346744  | 0.95108862 | 0.82912637 | 0.411905727 | TRUE  | FALSE |
| Q92997 | DVL3      | Segment polarity protein dishev     | 0.12944708 | 0.55404072 | 0.72489018 | 0.376408634 | FALSE | FALSE |
| P01833 | PIGR      | Polymeric immunoglobulin rece       | 0.12605785 | 0.72426166 | 0.75075894 | 0.382630941 | FALSE | FALSE |
| P67936 | TPM4      | Tropomyosin alpha-4 chain OS        | 0.12330298 | 0.54729793 | 0.57291144 | 0.319142042 | FALSE | FALSE |
| P22695 | UQCRC2    | Cytochrome b-c1 complex subu        | 0.12187394 | 0.36836021 | 0.72139001 | 0.376483003 | FALSE | FALSE |
| P01877 | IGHA2     | Ig alpha-2 chain C region OS        | 0.12040858 | 0.69661642 | 0.79289539 | 0.396767669 | FALSE | FALSE |
| Q14739 | LBR       | Lamin-B receptor OS                 | 0.11977303 | 0.48413483 | 0.57097373 | 0.31978655  | FALSE | FALSE |
| Q02413 | DSG1      | Desmoglein-1 OS                     | 0.11315481 | 0.46449172 | 0.51298608 | 0.296966733 | FALSE | FALSE |
| P46060 | RANGAP1   | Ran GTPase-activating protein 1     | 0.11072248 | 0.56715295 | 0.72227761 | 0.376470885 | FALSE | FALSE |
| P18206 | VCL       | Vinculin OS                         | 0.10929691 | 0.51775196 | 0.59670338 | 0.328849865 | FALSE | FALSE |
| P08842 | STS       | Steryl-sulfatase OS                 | 0.10802306 | 0.28895662 | 0.58370357 | 0.324279758 | TRUE  | FALSE |
| P13646 | KRT13     | Keratin, type I cytoskeletal 13 O   | 0.10649024 | 0.39378063 | 0.41463887 | 0.262858999 | FALSE | FALSE |
| Q7Z3Z0 | KRT25     | Keratin, type I cytoskeletal 25 O   | 0.10512686 | 0.28236485 | 0.36264596 | 0.24572732  | FALSE | FALSE |
| Q6P4A8 | PLBD1     | Phospholipase B-like 1 OS           | 0.09875543 | 0.22462962 | 0.44399017 | 0.27308919  | FALSE | FALSE |
| P22626 | HNRNPA2B1 | Heterogeneous nuclear ribonuc       | 0.09780826 | 0.61039221 | 0.73822535 | 0.379518835 | FALSE | FALSE |
| P22735 | TGM1      | Protein-glutamine gamma-gluta       | 0.09771765 | 0.37543843 | 0.48555849 | 0.284274091 | FALSE | FALSE |
| Q99627 | COPS8     | COP9 signalosome complex sub        | 0.09458558 | 0.10393773 | 0.42053322 | 0.264970118 | FALSE | FALSE |
| P56537 | EIF6      | Eukaryotic translation initiation   | 0.09172873 | 0.26529377 | 0.61005201 | 0.33309753  | FALSE | FALSE |
| P78385 | KRT83     | Keratin, type II cuticular Hb3 OS   | 0.09065665 | 0.56396958 | 0.76893275 | 0.389015346 | FALSE | FALSE |
| Q8IW75 | SERPINA12 | Serpin A12 OS                       | 0.09039162 | 0.23733333 | 0.50163148 | 0.291618864 | FALSE | FALSE |

|        |           |                                      |            |            |            |             |       |       |
|--------|-----------|--------------------------------------|------------|------------|------------|-------------|-------|-------|
| P62318 | SNRPD3    | Small nuclear ribonucleoprotein      | 0.08857809 | 0.51316956 | 0.69000452 | 0.366112795 | FALSE | FALSE |
| P02788 | LTF       | Lactotransferrin OS                  | 0.08725564 | 1.02979146 | 0.89678    | 0.43505759  | FALSE | FALSE |
| Q9G2U8 | FAM192A   | Protein FAM192A OS                   | 0.08606264 | 0.51660425 | 0.72840832 | 0.3763443   | FALSE | FALSE |
| P61244 | MAX       | Protein max OS                       | 0.08542866 | 0.13669299 | 0.39218932 | 0.254481818 | FALSE | FALSE |
| P02545 | LMNA      | Prelamin-A/C OS                      | 0.07888537 | 0.65216091 | 0.77892051 | 0.392148369 | FALSE | FALSE |
| Q16769 | QPCT      | Glutaminy-peptide cyclotransfe       | 0.07857148 | 0.62965491 | 0.88879897 | 0.432709351 | FALSE | FALSE |
| P28066 | PSMA5     | Proteasome subunit alpha type-       | 0.07763345 | 0.04605723 | 0.25286822 | 0.20534158  | FALSE | FALSE |
| P35237 | SERPINB6  | Serpin B6 OS                         | 0.07706816 | 0.41483346 | 0.73491012 | 0.378756671 | FALSE | FALSE |
| P60510 | PPP4C     | Serine/threonine-protein phosph      | 0.07141248 | 0.40585748 | 0.84473856 | 0.417154844 | FALSE | FALSE |
| Q9NSB2 | KRT84     | Keratin, type II cuticular Hb4 OS    | 0.06397102 | 0.42225203 | 0.70242868 | 0.368916377 | FALSE | FALSE |
| Q7Z3Y8 | KRT27     | Keratin, type I cytoskeletal 27 O    | 0.06365923 | 0.28339014 | 0.51936534 | 0.298984691 | FALSE | FALSE |
| P30086 | PEBP1     | Phosphatidylethanolamine-bind        | 0.06349648 | 0.47202632 | 0.7785586  | 0.392444171 | FALSE | FALSE |
| P55786 | NPEPPS    | Puromycin-sensitive aminopept        | 0.06159725 | 0.55695258 | 0.90122802 | 0.436702908 | FALSE | FALSE |
| P25311 | AZGP1     | Zinc-alpha-2-glycoprotein OS         | 0.06152443 | 0.71504593 | 0.81470033 | 0.406203624 | FALSE | FALSE |
| Q01546 | KRT76     | Keratin, type II cytoskeletal 2 or   | 0.0598985  | 0.26624456 | 0.60530062 | 0.331818199 | FALSE | FALSE |
| Q9Y5K3 | PCYT1B    | Choline-phosphate cytidylyltran      | 0.05981152 | 1.15719398 | 0.95354825 | 0.453548075 | TRUE  | FALSE |
| Q15019 | 42980     | Septin-2 OS                          | 0.05402501 | 0.2986719  | 0.78370717 | 0.393599387 | FALSE | FALSE |
| O75131 | CPNE3     | Copine-3 OS                          | 0.05021791 | 0.2932073  | 0.72122128 | 0.376870791 | FALSE | FALSE |
| A6NDB9 | PALM3     | Paralemmin-3 OS                      | 0.04847871 | 0.08161396 | 0.55520326 | 0.314361663 | FALSE | FALSE |
| Q3S584 | KRT71     | Keratin, type II cytoskeletal 71 C   | 0.04745767 | 0.33519794 | 0.70076398 | 0.368510322 | FALSE | FALSE |
| P58107 | EPPK1     | Epiplakin OS                         | 0.04419571 | 0.52374226 | 0.83073992 | 0.412211885 | FALSE | FALSE |
| Q8WVV4 | POF1B     | Protein POF1B OS                     | 0.04384993 | 0.34322447 | 0.76695565 | 0.388490609 | FALSE | FALSE |
| Q9BYJ1 | ALOXE3    | Epidermis-type lipoxygenase 3 C      | 0.04235371 | 0.16548348 | 0.5977497  | 0.328987851 | FALSE | FALSE |
| Q14574 | DSC3      | Desmocollin-3 OS                     | 0.04038499 | 0.36887531 | 0.81865103 | 0.407681636 | FALSE | FALSE |
| Q13867 | BLMH      | Bleomycin hydrolyase OS              | 0.03567172 | 0.22436421 | 0.74016078 | 0.379569633 | FALSE | FALSE |
| O00193 | SMAP      | Small acidic protein OS              | 0.03319506 | 0.50195329 | 0.8776571  | 0.429307614 | FALSE | FALSE |
| O75342 | ALOX12B   | Arachidonate 12-lipoxygenase, :      | 0.03237681 | 0.21403315 | 0.75218307 | 0.382884648 | FALSE | FALSE |
| Q92817 | EVPL      | Envoplakin OS                        | 0.0323203  | 0.19296042 | 0.85192884 | 0.419203081 | FALSE | FALSE |
| Q14525 | KRT33B    | Keratin, type I cuticular Ha3-II O   | 0.02500836 | 0.20616775 | 0.82395401 | 0.409828708 | FALSE | FALSE |
| Q9UI42 | CPA4      | Carboxypeptidase A4 OS               | 0.02370902 | 0.24366806 | 0.83841164 | 0.415022127 | FALSE | FALSE |
| Q5VVQ6 | YOD1      | Ubiquitin thioesterase OTU1 OS       | 0.02286482 | 0.36120849 | 0.94316068 | 0.451203411 | FALSE | FALSE |
| P08727 | KRT19     | Keratin, type I cytoskeletal 19 O    | 0.02172084 | 0.26333961 | 0.84784912 | 0.417692854 | FALSE | FALSE |
| P42357 | HAL       | Histidine ammonia-lyase OS           | 0.02120345 | 0.25126401 | 0.85951854 | 0.422434794 | FALSE | FALSE |
| P51532 | SMARCA4   | Transcription activator BRG1 OS      | 0.01573799 | 0.60740461 | 0.96828255 | 0.457398234 | FALSE | FALSE |
| P54886 | ALDH18A1  | Delta-1-pyrroline-5-carboxylate      | 0.01557202 | 0.67927117 | 0.96631176 | 0.456989543 | FALSE | FALSE |
| P19013 | KRT4      | Keratin, type II cytoskeletal 4 O    | 0.00901406 | 0.32996717 | 0.94924245 | 0.453064142 | FALSE | FALSE |
| Q96P63 | SERPINB12 | Serpin B12 OS                        | 0.0084006  | 0.29582872 | 0.95241703 | 0.454055024 | FALSE | FALSE |
| Q14240 | EIF4A2    | Eukaryotic initiation factor 4A-II   | 0.0072145  | 1.11687469 | 0.99418453 | 0.463803165 | FALSE | FALSE |
| Q6KB66 | KRT80     | Keratin, type II cytoskeletal 80 C   | 0.00470612 | 0.2037575  | 0.9532578  | 0.453932287 | FALSE | FALSE |
| O43143 | DXH15     | Putative pre-mRNA-splicing fact      | 0.00415325 | 0.58257377 | 0.99126895 | 0.464014156 | FALSE | FALSE |
| Q2M215 | KRT24     | Keratin, type I cytoskeletal 24 O    | 0.00379707 | 0.51286916 | 0.98758451 | 0.462813603 | FALSE | FALSE |
| Q13835 | PKP1      | Plakophilin-1 OS                     | 0.00365994 | 0.37312997 | 0.98355187 | 0.462496898 | FALSE | FALSE |
| P49862 | KLK7      | Kallikrein-7 OS                      | 0.00255468 | 0.20588056 | 0.97919357 | 0.460971915 | FALSE | FALSE |
| Q9NUW8 | TDP1      | Tyrosyl-DNA phosphodiesterase        | 0.00127155 | 0.86354114 | 0.99819658 | 0.465149853 | FALSE | FALSE |
| P20930 | FLG       | Filaggrin OS                         | 8.3476E-05 | 0.61780938 | 0.9997734  | 0.464836527 | FALSE | FALSE |
| P07355 | ANXA2     | Annexin A2 OS                        | -8.277E-05 | 0.25440436 | 0.99920153 | 0.465093804 | FALSE | FALSE |
| P49427 | CDC34     | Ubiquitin-conjugating enzyme E       | -0.0010405 | 0.02450748 | 0.96182272 | 0.45538762  | FALSE | FALSE |
| P05783 | KRT18     | Keratin, type I cytoskeletal 18 O    | -0.0019183 | 0.25629124 | 0.98744831 | 0.463275503 | FALSE | FALSE |
| O75874 | IDH1      | Isocitrate dehydrogenase [NADf       | -0.0025749 | 0.42624316 | 0.99260164 | 0.463587962 | FALSE | FALSE |
| P00441 | SOD1      | Superoxide dismutase [Cu-Zn] C       | -0.003057  | 0.2405983  | 0.98444042 | 0.462388682 | FALSE | FALSE |
| Q15003 | NCAPH     | Condensin complex subunit 2 O-       | -0.0048728 | 0.73549098 | 0.991886   | 0.463777766 | FALSE | FALSE |
| Q96QA5 | GSDMA     | Gasdermin-A OS                       | -0.0055732 | 0.226866   | 0.95882762 | 0.455011958 | FALSE | FALSE |
| Q9BPX3 | NCAPG     | Condensin complex subunit 3 O-       | -0.0137592 | 0.49863254 | 0.95945871 | 0.454789295 | FALSE | FALSE |
| P51148 | RAB5C     | Ras-related protein Rab-5C OS        | -0.014643  | 0.841558   | 0.97869441 | 0.461262285 | FALSE | FALSE |
| Q16610 | ECM1      | Extracellular matrix protein 1 O:    | -0.017207  | 0.207877   | 0.86216384 | 0.422729602 | FALSE | FALSE |
| P50452 | SERPINB8  | Serpin B8 OS                         | -0.0177859 | 0.33786638 | 0.93566074 | 0.44813415  | FALSE | FALSE |
| Q9Y4X5 | ARIH1     | Protein ariadne-1 homolog OS         | -0.0182659 | 0.87189751 | 0.97435055 | 0.459739226 | FALSE | FALSE |
| Q15323 | KRT31     | Keratin, type I cuticular Ha1 OS     | -0.0190794 | 0.25467254 | 0.89040126 | 0.432979435 | FALSE | FALSE |
| P29508 | SERPINB3  | Serpin B3 OS                         | -0.019363  | 0.93515152 | 0.9580905  | 0.455184759 | FALSE | FALSE |
| Q7RTS7 | KRT74     | Keratin, type II cytoskeletal 74 C   | -0.01959   | 0.26536623 | 0.87689349 | 0.42944231  | FALSE | FALSE |
| Q7Z3Y9 | KRT26     | Keratin, type I cytoskeletal 26 O    | -0.0230385 | 0.12781361 | 0.78442962 | 0.393484111 | FALSE | FALSE |
| Q15149 | PLEC      | Plectin OS                           | -0.0241859 | 0.35275675 | 0.91632284 | 0.440915916 | FALSE | FALSE |
| Q5F1R6 | DNAJC21   | DnaJ homolog subfamily C mem         | -0.029387  | 0.66366057 | 0.94584766 | 0.451965741 | FALSE | FALSE |
| P12273 | PIP       | Prolactin-inducible protein OS       | -0.030869  | 0.44470695 | 0.86033514 | 0.422333956 | FALSE | FALSE |
| P09525 | ANXA4     | Annexin A4 OS                        | -0.0326552 | 0.34725438 | 0.84372889 | 0.417154633 | FALSE | FALSE |
| P04040 | CAT       | Catalase OS                          | -0.0391242 | 0.23380437 | 0.7272627  | 0.376694132 | TRUE  | FALSE |
| Q9NPQ8 | RIC8A     | Synembryon-A OS                      | -0.0420885 | 0.43172666 | 0.91277921 | 0.440235792 | FALSE | FALSE |
| Q7K285 | SUPT6H    | Transcription elongation factor :    | -0.0465825 | 0.61247664 | 0.90725239 | 0.439107322 | FALSE | FALSE |
| Q9NZT1 | CALML5    | Calmodulin-like protein 5 OS         | -0.0472777 | 0.97056579 | 0.90966899 | 0.439762005 | FALSE | FALSE |
| Q9Y6A4 | C16orf80  | UPF0468 protein C16orf80 OS          | -0.0472882 | 0.64199326 | 0.91015208 | 0.439481533 | FALSE | FALSE |
| Q70Z53 | FRA10AC1  | Protein FRA10AC1 OS                  | -0.0515333 | 0.91367984 | 0.93108623 | 0.446460526 | FALSE | FALSE |
| P52655 | GTF2A1    | Transcription initiation factor III/ | -0.0530115 | 0.74649231 | 0.91335295 | 0.439999088 | FALSE | FALSE |
| Q08554 | DSC1      | Desmocollin-1 OS                     | -0.0545055 | 0.15224725 | 0.42065301 | 0.264642178 | FALSE | FALSE |
| Q99456 | KRT12     | Keratin, type I cytoskeletal 12 O    | -0.0546628 | 0.4060258  | 0.7783843  | 0.39283538  | FALSE | FALSE |
| P46087 | NOP2      | Putative ribosomal RNA methyl        | -0.0567953 | 0.60340891 | 0.88548052 | 0.431602138 | FALSE | FALSE |
| P31151 | S100A7    | Protein S100-A7 OS                   | -0.0611384 | 0.7449528  | 0.83529658 | 0.413975923 | TRUE  | FALSE |

|            |          |                                   |            |            |            |             |       |       |
|------------|----------|-----------------------------------|------------|------------|------------|-------------|-------|-------|
| P59666     | DEFA3    | Neutrophil defensin 3 OS          | -0.0641523 | 0.47264375 | 0.87926799 | 0.42908001  | FALSE | FALSE |
| O76013     | KRT36    | Keratin, type I cuticular Ha6 OS  | -0.0646971 | 0.02459289 | 0.16716482 | 0.17316991  | FALSE | FALSE |
| Q9BUQ8     | DDX23    | Probable ATP-dependent RNA h      | -0.0695886 | 1.02684234 | 0.91728403 | 0.440865193 | FALSE | FALSE |
| Q09666     | AHNAK    | Neuroblast differentiation-assoc  | -0.0726911 | 0.29080354 | 0.60601346 | 0.331768958 | FALSE | FALSE |
| O43548     | TGM5     | Protein-glutamine gamma-gluta     | -0.081003  | 0.19842466 | 0.66667856 | 0.356481851 | FALSE | FALSE |
| Q14532     | KRT32    | Keratin, type I cuticular Ha2 OS  | -0.0832606 | 0.00051541 | 0.00278661 | 0.021732067 | FALSE | FALSE |
| P61626     | LYZ      | Lysozyme C OS                     | -0.0930116 | 0.46957152 | 0.64805317 | 0.347872695 | FALSE | FALSE |
| Q5T750     | XP32     | Skin-specific protein 32 OS       | -0.0943103 | 0.46745662 | 0.76011988 | 0.385500473 | FALSE | FALSE |
| O75635     | SERPINB7 | Serpin B7 OS                      | -0.0959418 | 0.41400358 | 0.72696047 | 0.377010028 | FALSE | FALSE |
| P06576     | ATP5B    | ATP synthase subunit beta, mitc   | -0.1001103 | 0.55830922 | 0.67883641 | 0.36111418  | FALSE | FALSE |
| P04279     | SEMG1    | Semenogelin-1 OS                  | -0.1028212 | 2.14808394 | 0.92976913 | 0.446346774 | FALSE | FALSE |
| Q9C075     | KRT23    | Keratin, type I cytoskeletal 23 O | -0.1109866 | 0.30777332 | 0.46524914 | 0.27951014  | FALSE | FALSE |
| Q01081     | U2AF1    | Splicing factor U2AF 35 kDa sub   | -0.1218853 | 0.83022491 | 0.75916791 | 0.385490667 | FALSE | FALSE |
| A8K2U0     | A2ML1    | Alpha-2-macroglobulin-like prot   | -0.1239354 | 0.31330224 | 0.56399367 | 0.317598615 | FALSE | FALSE |
| O60911     | CTSL2    | Cathepsin L2 OS                   | -0.1321092 | 0.10026368 | 0.3135609  | 0.227777102 | FALSE | FALSE |
| P02768     | ALB      | Serum albumin OS                  | -0.1327626 | 0.55455176 | 0.46836616 | 0.280161135 | TRUE  | FALSE |
| P00918     | CA2      | Carbonic anhydrase 2 OS           | -0.1497029 | 0.50072753 | 0.74534381 | 0.380810189 | FALSE | FALSE |
| P08123     | COL1A2   | Collagen alpha-2(I) chain OS      | -0.1498058 | 0.30768738 | 0.61611935 | 0.334642133 | TRUE  | FALSE |
| P18510     | IL1RN    | Interleukin-1 receptor antagoni   | -0.154404  | 0.27488446 | 0.5726377  | 0.31942004  | FALSE | FALSE |
| P13473     | LAMP2    | Lysosome-associated membran       | -0.1618269 | 0.0185263  | 0.05142295 | 0.10419029  | FALSE | FALSE |
| P08670     | VIM      | Vimentin OS                       | -0.1624451 | 1.26948577 | 0.74647898 | 0.380919316 | FALSE | FALSE |
| P48594     | SERPINB4 | Serpin B4 OS                      | -0.1627528 | 1.08378635 | 0.72804968 | 0.376629787 | FALSE | FALSE |
| Q6ZVX7     | NCCRP1   | Non-specific cytotoxic cell rece  | -0.1650535 | 0.0895377  | 0.23318072 | 0.196696662 | FALSE | FALSE |
| Q96LR5     | UBE2E2   | Ubiquitin-conjugating enzyme E    | -0.1726928 | 1.26279592 | 0.87837935 | 0.429153029 | FALSE | FALSE |
| P47929     | LGALS7   | Galectin-7 OS                     | -0.1851545 | 0.98724919 | 0.69649179 | 0.367198051 | FALSE | FALSE |
| Q01469     | FABP5    | Fatty acid-binding protein, epid  | -0.1865107 | 0.05800183 | 0.13779875 | 0.166054856 | FALSE | FALSE |
| P54105     | CLNS1A   | Methylosome subunit pICln OS      | -0.1872588 | 0.24653976 | 0.31888821 | 0.228040011 | FALSE | FALSE |
| Q9UGM3     | DMBT1    | Deleted in malignant brain tum    | -0.1925758 | 0.73123927 | 0.69302951 | 0.367246406 | FALSE | FALSE |
| Q9H875     | PRKRIP1  | PRKR-interacting protein 1 OS     | -0.2011785 | 0.67159621 | 0.7448994  | 0.381526336 | FALSE | FALSE |
| P46777     | RPL5     | 60S ribosomal protein L5 OS       | -0.2024568 | 1.19561492 | 0.72419485 | 0.3769948   | FALSE | FALSE |
| Q15459     | SF3A1    | Splicing factor 3A subunit 1 OS   | -0.2137071 | 0.65389776 | 0.7243768  | 0.376615191 | FALSE | FALSE |
| P04792     | HSPB1    | Heat shock protein beta-1 OS      | -0.2159113 | 0.78567898 | 0.5721234  | 0.31956442  | FALSE | FALSE |
| P62987     | UBA52    | Ubiquitin-60S ribosomal protein   | -0.217784  | 0.32646917 | 0.36730416 | 0.248070349 | FALSE | FALSE |
| O76011     | KRT34    | Keratin, type I cuticular Ha4 OS  | -0.2209191 | 0.33423788 | 0.37080745 | 0.248810191 | FALSE | FALSE |
| P25815     | S100P    | Protein S100-P OS                 | -0.2279159 | 0.71020425 | 0.63420006 | 0.343109982 | FALSE | FALSE |
| Q9Y6W5     | WASF2    | Wiskott-Aldrich syndrome prote    | -0.2381047 | 0.76800919 | 0.73694581 | 0.379332835 | FALSE | FALSE |
| P07384     | CAPN1    | Calpain-1 catalytic subunit OS    | -0.2583269 | 0.12373905 | 0.2079058  | 0.186408671 | FALSE | FALSE |
| P17900     | GM2A     | Ganglioside GM2 activator OS      | -0.260667  | 0.21584958 | 0.09456934 | 0.140606696 | FALSE | FALSE |
| Q02880     | TOP2B    | DNA topoisomerase 2-beta OS       | -0.2786778 | 0.73167753 | 0.5772572  | 0.321130068 | FALSE | FALSE |
| Q9Y5P4     | COL4A3BP | Collagen type IV alpha-3-binding  | -0.2970485 | 0.51557795 | 0.56474492 | 0.317588982 | TRUE  | FALSE |
| P31947     | SFN      | 14-3-3 protein sigma OS           | -0.2999884 | 0.90611413 | 0.55520146 | 0.314791866 | FALSE | FALSE |
| Q8WXA9     | SREK1    | Splicing regulatory glutamine/ly  | -0.3083529 | 0.69449385 | 0.43995439 | 0.272227265 | FALSE | FALSE |
| Q96E39     | RBMXL1   | Heterogeneous nuclear ribonuc     | -0.3136615 | 0.7443504  | 0.54138115 | 0.308224343 | FALSE | FALSE |
| P08729     | KRT7     | Keratin, type II cytoskeletal 7 O | -0.3144749 | 0.53685769 | 0.2604168  | 0.207797191 | FALSE | FALSE |
| P31944     | CASP14   | Caspase-14 OS                     | -0.3154167 | 0.71457714 | 0.28717269 | 0.215032688 | FALSE | FALSE |
| O76009     | KRT33A   | Keratin, type I cuticular Ha3-I O | -0.3240967 | 0.23373396 | 0.30021724 | 0.222383141 | FALSE | FALSE |
| O94888     | UBXN7    | UBX domain-containing protein     | -0.3396208 | 0.67052374 | 0.60428846 | 0.33170327  | FALSE | FALSE |
| P48163     | ME1      | NADP-dependent malic enzyme       | -0.3397228 | 0.39675763 | 0.43945103 | 0.272323475 | FALSE | FALSE |
| P00738     | HP       | Haptoglobin OS                    | -0.352586  | 0.25557656 | 0.30152956 | 0.222955671 | FALSE | FALSE |
| Q969S3     | ZNF622   | Zinc finger protein 622 OS        | -0.3583003 | 0.68299148 | 0.59364649 | 0.328039949 | TRUE  | FALSE |
| Q9UNL2     | SSR3     | Translocon-associated protein s   | -0.4109622 | 0.64076997 | 0.5310165  | 0.303998365 | TRUE  | FALSE |
| Q99707     | MTR      | Methionine synthase OS            | -0.5781275 | 0.04708612 | 0.03662309 | 0.095807239 | FALSE | FALSE |
| Reverse_sp | TRPV5    | Transient receptor potential cat  | -0.7075599 | 0.64344257 | 0.1152479  | 0.153663866 | FALSE | FALSE |
| Q02383     | SEMG2    | Semenogelin-2 OS                  | -0.95327   | 3.42307518 | 0.67718856 | 0.360701811 | FALSE | FALSE |
| P15515     | HTN1     | Histatin-1 OS                     | -1.0046414 | 0.81649391 | 0.3320574  | 0.234215683 | FALSE | FALSE |
